# Supplementary material for: Hermetia illucens (L.) (Diptera: Stratiomyidae) Odorant Binding Proteins and Their Interactions with Selected Volatile Organic Compounds: An In Silico Approach
Source: MDPI journal article supplement (doi:10.3390/insects12090814), 2021-09-11
Supplement: s1 [file s1]

## ***Hermetia illucens* (L.) (Diptera: Stratiomyidae) Odorant Binding Proteins and Their Interactions with Selected Volatile Organic Compounds: An *in Silico* Approach**

Carmen Scieuzo<sup>1,2#</sup>, Marisa Nardiello<sup>1#</sup>, Donatella Farina<sup>1,2#</sup>, Andrea Scala<sup>1</sup>, Jonathan A. Cammack<sup>3</sup>, Jeffery K. Tomberlin<sup>3</sup>, Heiko Vogel<sup>4</sup>, Rosanna Salvia<sup>1,2\*</sup>, Krishna Persaud<sup>5\*</sup>, Patrizia Falabella<sup>1,2\*</sup>

1 Department of Sciences, University of Basilicata, Via dell'Ateneo Lucano 10, 85100, Potenza, Italy.

2 Spinoff XFlies s.r.l, University of Basilicata, Via dell'Ateneo Lucano 10, 85100, Potenza, Italy.

3 Department of Entomology, Texas A&M University, College Station, TX, USA

4 Department of Entomology, Max Planck Institute for Chemical Ecology, Hans-Knöll-Straße 8, D-07745, Jena, Germany.

5 Department of Chemical Engineering and Analytical Science, The University of Manchester, Manchester, M13 9PL, United Kingdom.

#equally

\*corresponding authors: [patrizia.falabella@unibas.it](mailto:patrizia.falabella@unibas.it); [krishna.persaud@manchester.ac.uk](mailto:krishna.persaud@manchester.ac.uk); [r.salvia@unibas.it](mailto:r.salvia@unibas.it)

| VOC                                 | REFERENCE     |
|-------------------------------------|---------------|
| 3-methyl-butanol                    | [105]         |
| Acetic acid, 1-methylethyl ester    | [106]         |
| 1-butanol                           | [107,108]     |
| 2-methyl-butanol                    | [109]         |
| 2-pentanone                         | [105,110,111] |
| 3-methyl-2-butanol                  | [112]         |
| 3-hydroxy-2-butanone                | [111,113]     |
| propanoic acid, ethyl ester         | [114]         |
| n-propyl acetate                    | [115]         |
| 3-methyl 1 butanol                  | [108,116,117] |
| 2-methyl 1 butanol                  | [108,117]     |
| propanoic acid, 1-methylethyl ester | [118]         |
| Acetic acid, 1-methylpropyl ester   | [119]         |
| 4-methyl heptane                    | [105]         |
| acetic acid, 2-methylpropyl ester   | [120,121]     |

|                                        |               |
|----------------------------------------|---------------|
| 2-hexanone                             | [122,123]     |
| propanoic acid, propyl ester           | [124]         |
| acetic acid, butyl ester               | [115,122]     |
| 2,4-dimethyl-1-heptene                 | [125]         |
| butanoic acid, 1-methylethyl ester     | [126,127]     |
| 2-pentanol, acetate                    | [128]         |
| butanoic acid, 2-methyl-, ethyl ester  | [129]         |
| 2-hexenal                              | [130]         |
| 4-methyl octane                        | [131,132]     |
| 2-hexen-1-ol                           | [105,110]     |
| 1-hexanol                              | [111,130,133] |
| 1-butanol, 3-methyl-, acetate          | [134,135]     |
| 1-butanol, 2-methyl-, acetate          | [136,137]     |
| 2-heptanone                            | [138-140]     |
| Styrene                                | [141,142]     |
| butanoic acid, propyl ester            | [143]         |
| propanoic acid, butyl ester            | [144,145]     |
| acetic acid, pentyl ester              | [146,147]     |
| alpha pinene                           | [110]         |
| butanoic acid, 2-methyl-, propyl ester | [148]         |
| Benzaldehyde                           | [108,111,149] |
| beta pinene                            | [150]         |
| 3-octanone                             | [151]         |
| 2-pentyl furan                         | [149,152-154] |
| butanoic acid, butyl ester             | [153,155]     |
| hexanoic acid, ethyl ester             | [121]         |
| acetic acid, hexyl ester               | [156,157]     |
| 2-hexen-1-ol, acetate                  | [158]         |
| 1,4-dichloro-benzene                   | [159]         |
| butanoic acid, 1-methylbutyl ester     | [160]         |
| Delta limonene                         | [161]         |
| butyl 2-methylbutanoate                | [158,162]     |
| butanoic acid, 3-methylbutyl ester     | [135]         |

|                                               |                |
|-----------------------------------------------|----------------|
| Acetophenone                                  | [163,164]      |
| butanoic acid, 3-methyl-, 3-methylbutyl ester | [135]          |
| hexanoic acid, butyl ester                    | [162,165]      |
| butanoic acid, 2-methyl, hexyl ester          | [166-168]      |
| isopentyl hexanoate                           | [135,169]      |
| hexanoic acid, hexyl ester                    | [147, 153,155] |
| Alpha farnesene                               | [166,170]      |
| Phenol                                        | [171]          |
| Butanoic acid                                 | [122]          |
| Trimethylamine                                | [172]          |
| 4 ethyl phenol                                | [173]          |
| 1- propanol                                   | [174,175]      |
| Acetone                                       | [176]          |
| Isobutyraldehyde                              | [177]          |
| Ethyl acetate                                 | [178]          |
| Ethanol                                       | [179]          |
| Geraniol                                      | [176]          |
| Linalool                                      | [180]          |
| Nonanal                                       | [181]          |
| Methyl propionate                             | [182]          |
| Hexanal                                       | [183,184]      |
| Ethyl butanoate                               | [185]          |
| (Z)-3-hexenal                                 | [186]          |
| Decanal                                       | [186]          |
| 6-methyl-5-hepten-2-one                       | [187]          |
| methyl ethyl ketone                           | [188]          |
| toluene                                       | [188]          |
| Methyl 2-hydroxyhexanoate                     | [178]          |
| Methyl 5-acetoxyhexanoate                     | [178]          |
| 3-Methylbutanoic acid                         | [176]          |
| 1-Heptanol                                    | [176]          |
| Geranial                                      | [176]          |
| Acetaldehyde                                  | [189]          |

|                          |       |
|--------------------------|-------|
| 2-Pentyl-furan           | [189] |
| 2-nonanone               | [190] |
| 2-octenone               | [190] |
| $\alpha$ -Caryophyllene  | [191] |
| Pentanal                 | [184] |
| 1-Hexene                 | [192] |
| 2-methylpropanal         | [193] |
| Methyl butanoate         | [194] |
| 2-Methyl butyl acetate   | [195] |
| 3-Methyl-4-ethylhexane   | [196] |
| Allyl isothiocyanate     | [197] |
| cis-3-hexenyl acetate    | [198] |
| 2-hexanol                | [199] |
| 2-Methylbutyl propanoate | [199] |
| Methyl anthranilate      | [200] |
| 1-nonanol                | [187] |
| Phenylethyl alcohol      | [201] |
| Dimethyl propanedioate   | [178] |
| Ethyl 2-methylbutanoate  | [202] |

**Table S1. Database of VOCs emitted from different food matrices.** VOC name and reference are listed.

| ODORANT BINDING PROTEINS |                                                                      |             |           |          |
|--------------------------|----------------------------------------------------------------------|-------------|-----------|----------|
| CONTIG NAME              | BLASTX                                                               | QUERY COVER | E – VALUE | IDENTITY |
| NHill_AD_C41290          | pheromone-binding protein-related protein 6-like [Hermetia illucens] | 98%         | 5e-57     | 78.07%   |
| NHill_AD_C42622          | general odorant-binding protein 84a isoform X1 [Hermetia illucens]   | 98%         | 8e-47     | 83.91%   |
| NHill_AD_C41232          | general odorant-binding protein 19d-like [Hermetia illucens]         | 59%         | 4e-94     | 98.58%   |
| NHill_AD_C30834          | general odorant-binding protein 19d-like [Hermetia illucens]         | 61%         | 1e-95     | 100%     |

|                 |                                                                         |     |        |         |
|-----------------|-------------------------------------------------------------------------|-----|--------|---------|
| NHill_AD_C54152 | general odorant-binding protein 84a isoform X1 [Hermetia illucens]      | 98% | 9e-41  | 84.15%  |
| NHill_AD_C42252 | general odorant-binding protein 84a isoform X2 [Hermetia illucens]      | 99% | 7e-48  | 84.62%  |
| NHill_AD_C18886 | general odorant-binding protein 83a-like [Hermetia illucens]            | 8%  | 7e-91  | 99.31%  |
| NHill_AD_C23028 | general odorant-binding protein 99a-like [Hermetia illucens]            | 80% | 6e-24  | 93.88%  |
| NHill_AD_C2668  | uncharacterized protein LOC119654785 [Hermetia illucens]                | 76% | 9e-107 | 100%    |
|                 | general odorant-binding protein 19d-like isoform X1 [Hermetia illucens] | 72% | 3e-64  | 64.19%  |
| NHill_AD_C2226  | unnamed protein product [Hermetia illucens]                             | 42% | 1e-79  | 99.17%  |
|                 | general odorant-binding protein 99a-like [Hermetia illucens]            | 28% |        | 100%    |
| NHill_AD_C5246  | uncharacterized protein LOC119655221 [Hermetia illucens]                | 70% | 4e-108 | 99.35%  |
|                 | general odorant-binding protein 99a-like [Hermetia illucens]            | 63% | 6e-22  | 36.23%  |
| NHill_AD_C16472 | OBP8 [Trichogramma japonicum]                                           | 86% | 0.0099 | 30.51%  |
| NHill_AD_C11937 | general odorant-binding protein 99a-like isoform X2 [Hermetia illucens] | 44% | 7e-33  | 61.86%  |
| NHill_AD_C11394 | general odorant-binding protein 99a-like [Hermetia illucens]            | 50% | 3e-80  | 97.79%  |
| NHill_AD_C1500  | general odorant-binding protein 28a-like [Hermetia illucens]            | 42% | 5e-101 | 100.00% |
| NHill_AD_C17009 | odorant-binding protein 59a [Hermetia illucens]                         | 59% | 8e-167 | 99.13%  |
| NHill_AD_C74693 | general odorant-binding protein 56d-like [Copidosoma floridanum]        | 63% | 8e8-66 | 75.00%  |
| NHill_AD_C4062  | uncharacterized protein LOC119655996 [Hermetia illucens]                | 37% | 4e-74  | 82.46%  |
|                 | general odorant-binding protein 83a [Drosophila willistoni]             | 14% | 3e-05  | 40.00%  |
| NHill_AD_C17957 | general odorant-binding protein 28a-like [Hermetia illucens]            | 75% | 4e-97  | 94.81%  |
| NHill_AD_C75784 | uncharacterized protein LOC119659326 [Hermetia illucens]                | 75% | 1e-55  | 98.82%  |
|                 | general odorant-binding protein 66-like [Hermetia illucens]             | 72% | 9e-31  | 62.20%  |
| NHill_AD_C61546 | unnamed protein product [Hermetia illucens]                             | 95% | 5e-52  | 100%    |
|                 | general odorant-binding protein 66-like [Hermetia illucens]             | 95% | 1e-32  | 65.98%  |
| NHill_AD_C43028 | uncharacterized protein LOC119661578 [Hermetia illucens]                | 48% | 5e-120 | 100%    |
|                 | general odorant-binding protein 68-like [Hermetia illucens]             |     |        |         |
| NHill_AD_C73118 | uncharacterized protein LOC119661137 [Hermetia illucens]                | 59% | 5e-44  | 98.65%  |
|                 | general odorant-binding protein 68-like [Hermetia illucens]             | 59% | 8e-30  | 71.62%  |
| NHill_AD_C56633 | odorant-binding protein 19 [Bradysia odoriphaga]                        | 96% | 4e-23  | 40.83%  |
|                 | uncharacterized protein LOC119648416 [Hermetia illucens]                | 99% | 8e-79  | 96.77%  |
| NHill_AD_C12724 | general odorant-binding protein 68-like [Hermetia illucens]             | 86% | 3e-112 | 98.14%  |
| NHill_AD_C32770 | general odorant-binding protein 99a-like [Hermetia illucens]            | 55% | 9e-74  | 88.81%  |
| NHill_AD_C1003  | general odorant-binding protein 99b-like [Hermetia illucens]            | 96% | 2e-87  | 96.92%  |

|                 |                                                                                                                                     |            |                 |                  |
|-----------------|-------------------------------------------------------------------------------------------------------------------------------------|------------|-----------------|------------------|
| NHill_AD_C56175 | uncharacterized protein LOC119654413 [Hermetia illucens]<br>general odorant-binding protein 99a-like [Hermetia illucens]            | 98%<br>98% | 2e-77<br>6e-65  | 96.61%<br>78.81% |
| NHill_AD_C23172 | general odorant-binding protein 99b-like [Hermetia illucens]                                                                        | 75%        | 1e-93           | 99.27%           |
| NHill_AD_C8085  | general odorant-binding protein 99a-like [Hermetia illucens]                                                                        | 52%        | 4e-84           | 100.00%          |
| NHill_AD_C1903  | uncharacterized protein LOC119656184 [Hermetia illucens]<br>general odorant-binding protein 99a-like isoform X2 [Hermetia illucens] | 35%<br>27% | 3e-113<br>1e-40 | 98.79%<br>51.91% |
| NHill_AD_C32259 | general odorant-binding protein 99b-like [Hermetia illucens]                                                                        | 78%        | 1e-80           | 98.52%           |
| NHill_AD_C11523 | general odorant-binding protein 99a-like [Hermetia illucens]                                                                        | 71%        | 3e-98           | 100%             |
| NHill_AD_C3768  | general odorant-binding protein 99a-like [Hermetia illucens]                                                                        | 83%        | 8e-71           | 92.86%           |
| NHill_AD_C2731  | general odorant-binding protein 99a-like isoform X1 [Hermetia illucens]                                                             | 56%        | 2e-104          | 97.40%           |
| NHill_AD_C1002  | general odorant-binding protein 99b-like [Hermetia illucens]                                                                        | 78%        | 2e-90           | 100%             |
| NHill_AD_C32362 | general odorant-binding protein 99a-like [Hermetia illucens]                                                                        | 60%        | 7e-22           | 49.07%           |
| NHill_AD_C12769 | general odorant-binding protein 99a-like [Hermetia illucens]                                                                        | 54%        | 4e-75           | 98.18%           |
| NHill_AD_C5932  | uncharacterized protein LOC119655003 [Hermetia illucens]<br>general odorant-binding protein 99a-like [Hermetia illucens]            | 61%<br>59% | 1e-91<br>3e-63  | 97.01%<br>71.54% |
| NHill_AD_C9042  | general odorant-binding protein 99a-like [Hermetia illucens]                                                                        | 88%        | 1e-82           | 100%             |
| NHill_AD_C70911 | uncharacterized protein LOC119654807 [Hermetia illucens]<br>general odorant-binding protein 99b-like [Hermetia illucens]            | 99%        | 7e-78<br>3e-52  | 98.28%<br>71.55% |
| NHill_AD_C8987  | general odorant-binding protein 99a-like [Hermetia illucens]                                                                        | 71%        | 7e-95           | 99.25%           |
| NHill_AD_C7966  | general odorant-binding protein 99a-like isoform X1 [Hermetia illucens]                                                             | 52%        | 1e-78           | 100%             |
| NHill_AD_C410   | general odorant-binding protein 99a-like isoform X1 [Hermetia illucens]                                                             | 62%        | 7e-90           | 100%             |
| NHill_AD_C61431 | general odorant-binding protein 99a-like [Hermetia illucens]                                                                        | 61%        | 8e-17           | 46.79%           |
| NHill_AD_C17801 | general odorant-binding protein 99a-like [Hermetia illucens]                                                                        | 61%        | 8e-17           | 46.79%           |
| NHill_AD_C76148 | general odorant-binding protein 56d [Copidosoma floridanum]                                                                         | 74%        | 9e9-33          | 71.43%           |

**Table S2a. Blastx analysis of *Hermetia illucens* OBP genes from adult transcriptome.** Each adult *H. illucens* contig sequence was manually checked with the BLASTX program from the National Center for Biotechnology Information (NCBI). For each sequence, the best matched protein was reported, with the respective Query Cover, the E-value and the Percentage of Identity.

# ODORANT RECEPTORS

| CONTIG NAME     | BLASTX                                                       | QUERY COVER | E – VALUE | IDENTITY |
|-----------------|--------------------------------------------------------------|-------------|-----------|----------|
| NHill_AD_C21581 | putative odorant receptor 92a [Hermetia illucens]            | 57%         | 5e-52     | 97.83%   |
| NHill_AD_C41456 | uncharacterized protein LOC119647277 [Hermetia illucens]     | 61%         | 3e-175    | 99.65%   |
|                 | odorant receptor 63a-like isoform X2 [Hermetia illucens]     | 61%         | 3e-127    | 70.77%   |
| NHill_AD_C32477 | odorant receptor 63a-like isoform X1 [Hermetia illucens]     | 38%         | 5e-179    | 82.66%   |
| NHill_AD_C40886 | odorant receptor 22c-like [Hermetia illucens]                | 72%         | 0.0       | 100%     |
| NHill_AD_C44491 | putative odorant receptor 71a [Hermetia illucens]            | 82%         | 2e-99     | 78.89%   |
| NHill_AD_C44088 | odorant receptor 56a-like [Hermetia illucens]                | 83%         | 0.0       | 98.78%   |
| NHill_AD_C41545 | odorant receptor 56a-like isoform X1 [Hermetia illucens]     | 86%         | 6e-112    | 98.80%   |
| NHill_AD_C12746 | uncharacterized protein LOC119646983 [Hermetia illucens]     | 47%         | 4e-164    | 100%     |
|                 | odorant receptor 59a-like [Hermetia illucens]                | 66%         | 2e-118    | 65.92%   |
| NHill_AD_C42139 | odorant receptor 33a-like isoform X1 [Hermetia illucens]     | 99%         | 0.0       | 97.37%   |
| NHill_AD_C41137 | odorant receptor coreceptor [Hermetia illucens]              | 21%         | 6e-11     | 89.19%   |
| NHill_AD_C40973 | odorant receptor 94a-like isoform X1 [Hermetia illucens]     | 66%         | 0.0       | 99.48%   |
| NHill_AD_C41586 | odorant receptor 94b-like [Hermetia illucens]                | 91%         | 4e-128    | 99.45%   |
| NHill_AD_C19031 | odorant receptor 94a-like [Hermetia illucens]                | 87%         | 0.0       | 99.48%   |
| NHill_AD_C63662 | odorant receptor 85c-like [Hermetia illucens]                | 59%         | 2e-45     | 96.30%   |
| NHill_AD_C25031 | odorant receptor 2a-like [Hermetia illucens]                 | 100%        | 4e-64     | 100%     |
| NHill_AD_C41079 | odorant receptor 22c-like [Hermetia illucens]                | 70%         | 0.0       | 99.49%   |
| NHill_AD_C31170 | uncharacterized protein LOC119646234 [Hermetia illucens]     | 88%         | 3e-147    | 100%     |
|                 | odorant receptor 63a-like isoform X2 [Hermetia illucens]     | 88%         | 5e-60     | 49.54%   |
| NHill_AD_C40852 | odorant receptor 33a-like [Hermetia illucens]                | 87%         | 3e-85     | 100%     |
| NHill_AD_C41000 | odorant receptor 2a-like [Hermetia illucens]                 | 75%         | 0.0       | 98.93%   |
| NHill_AD_C29699 | odorant receptor 2a-like [Hermetia illucens]                 | 80%         | 0.0       | 99.24%   |
| NHill_AD_C53183 | odorant receptor 33b-like [Hermetia illucens]                | 66%         | 7e-129    | 98.91%   |
| NHill_AD_C42212 | odorant receptor 59a-like [Hermetia illucens]                | 92%         | 2e-135    | 65.15%   |
| NHill_AD_C24181 | odorant receptor 33a-like [Hermetia illucens]                | 59%         | 5e-167    | 98.04%   |
| NHill_AD_C53408 | putative odorant receptor 92a isoform X1 [Hermetia illucens] | 86%         | 5e-88     | 100.00%  |
| NHill_AD_C43841 | unnamed protein product [Hermetia illucens]                  | 86%         | 0.0       | 99.69%   |
|                 | odorant receptor 2a-like [Hermetia illucens]                 | 85%         | 1e-47     | 29.71%   |
| NHill_AD_C42051 | odorant receptor 33a-like [Hermetia illucens]                | 99%         | 1e-87     | 100%     |
| NHill_AD_C43031 | odorant receptor 49b-like [Hermetia illucens]                | 27%         | 2e-59     | 99.03%   |

|                 |                                                              |     |        |         |
|-----------------|--------------------------------------------------------------|-----|--------|---------|
| NHill_AD_C42994 | odorant receptor 59a-like [Hermetia illucens]                | 98% | 5e-51  | 98.82%  |
| NHill_AD_C43077 | putative odorant receptor 71a [Hermetia illucens]            | 58% | 8e-159 | 95.82%  |
| NHill_AD_C42222 | putative odorant receptor 71a [Hermetia illucens]            | 86% | 0.0    | 98.88%  |
| NHill_AD_C44928 | odorant receptor 94b-like [Hermetia illucens]                | 99% | 5e-95  | 98.87%  |
| NHill_AD_C41233 | odorant receptor 94a-like [Hermetia illucens]                | 70% | 0.0    | 99.20%  |
| NHill_AD_C43775 | odorant receptor 19a-like [Hermetia illucens]                | 89% | 0.0    | 98.93%  |
| NHill_AD_C46337 | unnamed protein product [Hermetia illucens]                  | 76% | 0.0    | 94.92%  |
|                 | odorant receptor 19a-like [Hermetia illucens]                | 64% | 2e-27  | 27.78%  |
| NHill_AD_C23297 | odorant receptor coreceptor [Hermetia illucens]              | 64% | 0.0    | 100%    |
| NHill_AD_C41392 | odorant receptor 85b-like [Hermetia illucens]                | 87% | 0.0    | 99.25%  |
| NHill_AD_C43182 | putative odorant receptor 92a isoform X2 [Hermetia illucens] | 99% | 2e-57  | 100%    |
| NHill_AD_C42500 | odorant receptor 23a-like [Hermetia illucens]                | 87% | 0.0    | 99.73%  |
| NHill_AD_C40891 | odorant receptor 2a-like [Hermetia illucens]                 | 95% | 0.0    | 96.61%  |
| NHill_AD_C41817 | odorant receptor 2a-like [Hermetia illucens]                 | 65% | 2e-73  | 97.25%  |
| NHill_AD_C45790 | odorant receptor 33a-like [Hermetia illucens]                | 43% | 0.0    | 99.20%  |
| NHill_AD_C39414 | odorant receptor 33a-like [Hermetia illucens]                | 99% | 0.0    | 94.14%  |
| NHill_AD_C40888 | odorant receptor 33b-like isoform X2 [Hermetia illucens]     | 99% | 7e-157 | 97.50%  |
| NHill_AD_C47973 | odorant receptor 33b-like isoform X3 [Hermetia illucens]     | 88% | 8e-47  | 67.94%  |
| NHill_AD_C41400 | odorant receptor 33a-like [Hermetia illucens]                | 84% | 2e-57  | 100%    |
| NHill_AD_C34422 | odorant receptor 33b-like [Hermetia illucens]                | 53% | 3e-17  | 97.87%  |
| NHill_AD_C41519 | unnamed protein product [Hermetia illucens]                  | 88% | 5e-76  | 99.24%  |
|                 | odorant receptor 33b-like [Hermetia illucens]                | 88% | 6e-73  | 99.24%  |
| NHill_AD_C44475 | odorant receptor 33b-like [Hermetia illucens]                | 97% | 0.0    | 99.32%  |
| NHill_AD_C42002 | odorant receptor 59a-like [Hermetia illucens]                | 79% | 7e-127 | 100%    |
| NHill_AD_C45287 | unnamed protein product [Hermetia illucens]                  | 99% | 6e-128 | 100.00% |
|                 | odorant receptor 33b-like [Hermetia illucens]                | 99% | 2e-108 | 87.91%  |
| NHill_AD_C33589 | odorant receptor 33a-like isoform X4 [Hermetia illucens]     | 97% | 8e-158 | 95.58%  |
| NHill_AD_C44439 | odorant receptor 33a-like [Hermetia illucens]                | 51% | 1e-53  | 98.80%  |
| NHill_AD_C32178 | odorant receptor 47a-like isoform X3 [Hermetia illucens]     | 99% | 4e-99  | 86.29%  |
| NHill_AD_C42199 | odorant receptor 33a-like [Hermetia illucens]                | 95% | 0.0    | 100.00% |
| NHill_AD_C41082 | odorant receptor 33a-like isoform X1 [Hermetia illucens]     | 99% | 5e-158 | 99.54%  |
| NHill_AD_C22258 | odorant receptor 33b-like [Hermetia illucens]                | 34% | 0.0    | 99.73%  |
| NHill_AD_C41468 | odorant receptor 2a-like [Hermetia illucens]                 | 30% | 4e-65  | 77.54%  |
| NHill_AD_C68947 | odorant receptor 63a-like [Hermetia illucens]                | 68% | 6e-58  | 100%    |
| NHill_AD_C11445 | odorant receptor 63a-like [Hermetia illucens]                | 73% | 0.0    | 99.73%  |



|                 |                                                           |     |        |        |
|-----------------|-----------------------------------------------------------|-----|--------|--------|
| NHill_AD_C41945 | odorant receptor 2a-like [Hermetia illucens]              | 99% | 9e-73  | 98.21% |
| NHill_AD_C44667 | odorant receptor 59a-like [Hermetia illucens]             | 82% | 3e-154 | 64.22% |
| NHill_AD_C35353 | odorant receptor 33a-like isoform X10 [Hermetia illucens] | 31% | 3e-17  | 93.75% |
| NHill_AD_C8206  | odorant receptor 33a-like [Hermetia illucens]             | 73% | 0.0    | 74.35% |
| NHill_AD_C41435 | odorant receptor 59a-like [Hermetia illucens]             | 95% | 0.0    | 100%   |
| NHill_AD_C54061 | putative odorant receptor 85e [Hermetia illucens]         | 57% | 2e-48  | 100%   |
| NHill_AD_C41180 | uncharacterized protein LOC119658097 [Hermetia illucens]  | 67% | 0.0    | 98.99% |
|                 | odorant receptor 94a-like [Hermetia illucens]             | 65% | 1e-89  | 41.30% |
| NHill_AD_C42546 | odorant receptor 33a-like [Hermetia illucens]             | 97% | 0.0    | 100%   |
| NHill_AD_C41347 | odorant receptor 33a-like isoform X2 [Hermetia illucens]  | 85% | 0.0    | 92.28% |
| NHill_AD_C45661 | odorant receptor 33a-like [Hermetia illucens]             | 86% | 0.0    | 94.72% |
| NHill_AD_C41258 | odorant receptor 33a-like isoform X2 [Hermetia illucens]  | 99% | 0.0    | 98.39% |
| NHill_AD_C7984  | odorant receptor 13a [Hermetia illucens]                  | 68% | 0.0    | 98.78% |
| NHill_AD_C38560 | uncharacterized protein LOC119646234 [Hermetia illucens]  | 55% | 0.0    | 89.74% |
|                 | odorant receptor 63a-like isoform X2 [Hermetia illucens]  | 54% | 4e-113 | 50.26% |
| NHill_AD_C54695 | putative odorant receptor 92a [Hermetia illucens]         | 91% | 1e-117 | 92.74% |
| NHill_AD_C43878 | odorant receptor 56a-like isoform X2 [Hermetia illucens]  | 43% | 1e-24  | 100%   |
| NHill_AD_C42007 | odorant receptor 33a-like [Hermetia illucens]             | 70% | 8e-117 | 100%   |
| NHill_AD_C43319 | odorant receptor 33a-like isoform X2 [Hermetia illucens]  | 99% | 2e-42  | 100%   |
| NHill_AD_C41351 | odorant receptor 59a-like [Hermetia illucens]             | 59% | 2e-175 | 98.12% |
| NHill_AD_C43290 | odorant receptor 33b-like [Hermetia illucens]             | 71% | 0.0    | 98.01% |
| NHill_AD_C45322 | odorant receptor 2a-like isoform X1 [Hermetia illucens]   | 77% | 0.0    | 100%   |
| NHill_AD_C25667 | odorant receptor 2a-like [Hermetia illucens]              | 73% | 0.0    | 98.70% |
| NHill_AD_C26571 | odorant receptor 33a-like [Hermetia illucens]             | 97% | 0.0    | 98.37% |
| NHill_AD_C30148 | unnamed protein product [Hermetia illucens]               | 83% | 0.0    | 99.75% |
|                 | odorant receptor 33a-like [Hermetia illucens]             | 79% |        | 99.74% |
| NHill_AD_C42377 | odorant receptor 2a-like [Hermetia illucens]              | 82% | 0.0    | 74.93% |
| NHill_AD_C41922 | odorant receptor 2a-like [Hermetia illucens]              | 77% | 1e-173 | 68.25% |
| NHill_AD_C44474 | odorant receptor 33b-like [Hermetia illucens]             | 99% | 2e-152 | 100%   |
| NHill_AD_C42132 | odorant receptor 33b-like [Hermetia illucens]             | 95% | 0.0    | 98.16% |
| NHill_AD_C43759 | odorant receptor 59b-like [Hermetia illucens]             | 79% | 0.0    | 100%   |
| NHill_AD_C41186 | odorant receptor 2a-like isoform X1 [Hermetia illucens]   | 84% | 0.0    | 99.73% |
| NHill_AD_C41447 | odorant receptor 2a-like [Hermetia illucens]              | 90% | 3e-128 | 88.39% |
| NHill_AD_C41520 | odorant receptor 33a-like [Hermetia illucens]             | 89% | 1e-62  | 83.72% |

|                 |                                                                                                                               |       |        |        |
|-----------------|-------------------------------------------------------------------------------------------------------------------------------|-------|--------|--------|
| NHill_AD_C42523 | odorant receptor 33a-like isoform X1 [Hermetia illucens]                                                                      | 88%   | 0.0    | 100%   |
| NHill_AD_C40853 | odorant receptor 33a-like isoform X1 [Hermetia illucens]                                                                      | 74%   | 1e-151 | 88.46% |
| NHill_AD_C35696 | odorant receptor 33a-like isoform X3 [Hermetia illucens]                                                                      | 52%   | 0.0    | 87.91% |
| NHill_AD_C41761 | odorant receptor 67c-like isoform X1 [Hermetia illucens]                                                                      | 80%   | 0.0    | 95.65% |
| NHill_AD_C45972 | putative odorant receptor 92a [Hermetia illucens]                                                                             | 89%   | 0.0    | 99.73% |
| NHill_AD_C15333 | putative odorant receptor 92a isoform X2 [Hermetia illucens]                                                                  | 81%   | 0.0    | 97.97% |
| NHill_AD_C42441 | putative odorant receptor 92a [Hermetia illucens]                                                                             | 68%   | 0.0    | 98.71% |
| NHill_AD_C21580 | putative odorant receptor 92a [Hermetia illucens]                                                                             | 82%   | 0.0    | 81.40% |
| NHill_AD_C41243 | putative odorant receptor 92a [Hermetia illucens]                                                                             | 93%   | 0.0    | 93.29% |
| NHill_AD_C41341 | ionotropic receptor IR2 [Colaphellus bowringi]<br>uncharacterized protein LOC119651354 isoform X1 [Hermetia illucens]         | 75%   | 9e-101 | 36.20% |
|                 |                                                                                                                               | 90%   | 0.0    | 98.96% |
| NHill_AD_C11008 | ionotropic receptor 75a-like isoform X1 [Hermetia illucens]                                                                   | 47%   | 4e-121 | 100%   |
| NHill_AD_C21099 | ionotropic receptor 75a-like isoform X3 [Hermetia illucens]                                                                   | 40%   | 6e-128 | 100%   |
| NHill_AD_C42032 | ionotropic receptor 21a isoform X1 [Hermetia illucens]                                                                        | 83%   | 0.0    | 99.62% |
| NHill_AD_C20652 | ionotropic receptor 25a [Hermetia illucens]                                                                                   | 72%   | 1e-121 | 100%   |
| NHill_AD_C43496 | ionotropic receptor [Bactrocera dorsalis]<br>LOW QUALITY PROTEIN: uncharacterized protein<br>LOC119655012 [Hermetia illucens] | 80%   | 2e-09  | 38.30% |
|                 |                                                                                                                               | 99%   | 2e-64  | 93.69% |
| NHill_AD_C44323 | ionotropic receptor 56b [Drosophila melanogaster]<br>uncharacterized protein LOC119655200 [Hermetia illucens]                 | 80.5% | 97%    | 1e-12  |
|                 |                                                                                                                               | 100%  | 0.0    | 97.35% |
| NHill_AD_C38475 | ionotropic receptor 56c [Drosophila melanogaster]<br>unnamed protein product [Hermetia illucens]                              | 41%   | 1e-04  | 24.35% |
|                 |                                                                                                                               | 61%   | 2e-50  | 48.52% |
| NHill_AD_C66692 | ionotropic receptor 56d [Drosophila melanogaster]<br>unnamed protein product [Hermetia illucens]                              | 92%   | 2e-10  | 28.38% |
|                 |                                                                                                                               | 99%   | 3e-105 | 96.20% |
| NHill_AD_C52359 | unnamed protein product [Hermetia illucens]<br>glutamate receptor ionotropic, delta-2 [Lucilia sericata]                      | 50%   | 2e-130 | 95.38% |
|                 |                                                                                                                               | 61%   | 6e-07  | 25.88% |
| NHill_AD_C41221 | putative ionotropic receptor IR8 [Scaeva pyrastris]<br>uncharacterized protein LOC119650383 [Hermetia illucens]               | 69%   | 4e-94  | 55.78% |
|                 |                                                                                                                               | 79%   | 0.0    | 98.81% |
| NHill_AD_C44460 | ionotropic receptor [Procecidochares utilis]<br>uncharacterized protein LOC119650383 [Hermetia illucens]                      | 50%   | 1e-84  | 61.00% |
|                 |                                                                                                                               | 99%   | 0.0    | 98.74% |
| NHill_AD_C41222 | putative ionotropic receptor IR8 [Scaeva pyrastris]<br>uncharacterized protein LOC119650383 [Hermetia illucens]               | 49%   | 1e-26  | 77.14% |
|                 |                                                                                                                               | 38%   | 6e-28  | 98.18% |
| NHill_AD_C53362 | ionotropic receptor 67c [Drosophila melanogaster]<br>unnamed protein product [Hermetia illucens]                              | 71%   | 2e-09  | 23.29% |
|                 |                                                                                                                               | 93%   | 0.0    | 96.17% |

|                 |                                                                     |      |        |        |
|-----------------|---------------------------------------------------------------------|------|--------|--------|
| NHill_AD_C72456 | ionotropic receptor 67c [Drosophila melanogaster]                   | 98%  | 3e-15  | 30.91% |
|                 | unnamed protein product [Hermetia illucens]                         | 100% | 5e-94  | 94.90% |
| NHill_AD_C44637 | ionotropic receptor 75a-like [Hermetia illucens]                    | 94%  | 0.0    | 93.33% |
| NHill_AD_C30659 | ionotropic receptor 93a isoform X2 [Hermetia illucens]              | 87%  | 0.0    | 99.72% |
| NHill_AD_C43588 | unnamed protein product [Hermetia illucens]                         | 100% | 7e-130 | 96.37% |
|                 | glutamate receptor ionotropic, delta-1 [Hermetia illucens]          | 66%  | 1e-84  | 97.66% |
| NHill_AD_C6138  | unnamed protein product [Hermetia illucens]                         | 65%  | 0.0    | 98.04% |
|                 | ionotropic receptor 25a [Hermetia illucens]                         | 66%  | 0.0    | 98.16% |
| NHill_AD_C47154 | putative ionotropic receptor IR11 [Scaeva pyrastris]                | 64%  | 1e-49  | 44.86% |
|                 | uncharacterized protein LOC119651974 isoform X1 [Hermetia illucens] | 90%  | 3e-139 | 97.30% |
| NHill_AD_C31205 | putative ionotropic receptor IR6 [Scaeva pyrastris]                 | 50%  | 2e-13  | 58.93% |
|                 | uncharacterized protein LOC119651974 isoform X1 [Hermetia illucens] | 45%  | 2e-24  | 98.04% |
| NHill_AD_C62171 | ionotropic receptor 85a [Peridroma saucia]                          | 89%  | 4e-04  | 32.00% |
|                 | unnamed protein product [Hermetia illucens]                         | 99%  | 6e-64  | 90.99% |
| NHill_AD_C34789 | ionotropic receptor 25a [Hermetia illucens]                         | 92%  | 0.0    | 100%   |
| NHill_AD_C22408 | putative ionotropic receptor IR2 [Scaeva pyrastris]                 | 78%  | 2e-164 | 46.53% |
|                 | uncharacterized protein LOC119651108 isoform X1 [Hermetia illucens] | 93%  | 0.0    | 99.06% |
| NHill_AD_C31183 | 75a-like isoform X3 [Hermetia illucens]                             | 99%  | 2e-58  | 98.98  |
| NHill_AD_C46271 | ionotropic receptor 25a [Hermetia illucens]                         | 16%  | 1e-05  | 95.45% |
| NHill_AD_C41702 | ionotropic receptor 40a [Hermetia illucens]                         | 65%  | 8e-65  | 95.58% |

**Table S2b. Blastx analysis of *Hermetia illucens* olfactory receptor genes from adult transcriptome.** Each adult *H. illucens* contig sequence was manually checked with the BLASTX program from the National Center for Biotechnology Information (NCBI). For each sequence, the best matched protein was reported, with the respective Query Cover, the E-value and the Percentage of Identity.

| GUSTATORY RECEPTORS |                                                                              |             |           |          |
|---------------------|------------------------------------------------------------------------------|-------------|-----------|----------|
| CONTIG NAME         | BLASTX                                                                       | QUERY COVER | E – VALUE | IDENTITY |
| NHill_AD_C30527     | gustatory and odorant receptor 22-like [Hermetia illucens]                   | 82%         | 1e-155    | 78.33%   |
| NHill_AD_C67675     | putative gustatory receptor 28b isoform X2 [Hermetia illucens]               | 63%         | 7e-78     | 100%     |
| NHill_AD_C30866     | gustatory receptor for sugar taste 64f isoform X3 [Drosophila pseudoobscura] | 99%         | 7e-30     | 47.17%   |
|                     | unnamed protein product [Hermetia illucens]                                  | 99%         | 8e-66     | 100%     |

|                 |                                                                                                                      |            |                |                  |
|-----------------|----------------------------------------------------------------------------------------------------------------------|------------|----------------|------------------|
| NHill_AD_C19982 | uncharacterized protein LOC119650006 [Hermetia illucens]<br>putative gustatory receptor 28a [Culex quinquefasciatus] | 56%<br>35% | 8e-94<br>5e-09 | 98.11%<br>33.98% |
| NHill_AD_C41457 | gustatory and odorant receptor 22-like [Hermetia illucens]                                                           | 99%        | 2e-91          | 100%             |
| NHill_AD_C41699 | gustatory and odorant receptor 22-like [Hermetia illucens]                                                           | 30%        | 1e-163         | 100%             |
| NHill_AD_C78658 | gustatory and odorant receptor 22-like [Teleopsis dalmanni]                                                          | 59%        | 8e-33          | 84.44%           |
| NHill_AD_C29794 | putative gustatory receptor 28b isoform X1 [Hermetia illucens]                                                       | 91%        | 1e-98          | 99.40%           |
| NHill_AD_C29688 | putative gustatory receptor 28b isoform X2 [Hermetia illucens]                                                       | 68%        | 7e-149         | 100%             |
| NHill_AD_C51136 | uncharacterized protein LOC119647209 [Hermetia illucens]                                                             | 81%        | 1e-39          | 38.22%           |
|                 | putative gustatory receptor 28b isoform X3 [Hermetia illucens]                                                       | 81%        | 2e-37          | 36.65%           |
| NHill_AD_C29460 | putative gustatory receptor 28b isoform X1 [Hermetia illucens]                                                       | 81%        | 9e-168         | 98.74%           |
| NHill_AD_C49312 | putative gustatory receptor 2a [Hermetia illucens]                                                                   | 83%        | 00.0           | 97.29%           |
| NHill_AD_C40950 | gustatory receptor 68a-like isoform X4 [Hermetia illucens]                                                           | 37%        | 2e-137         | 98.52%           |
| NHill_AD_C66298 | gustatory and pheromone receptor 33a [Hermetia illucens]                                                             | 100%       | 3e-79          | 96.72%           |
| NHill_AD_C51573 | putative gustatory receptor 57a [Hermetia illucens]                                                                  | 66%        | 1e-162         | 98.68%           |
| NHill_AD_C10478 | putative gustatory receptor 59f [Hermetia illucens]                                                                  | 75%        | 5e-50          | 100%             |
| NHill_AD_C40866 | gustatory and odorant receptor 63a [Hermetia illucens]                                                               | 86%        | 0.0            | 100%             |
| NHill_AD_C44258 | gustatory receptor for sugar taste 64a-like [Hermetia illucens]                                                      | 85%        | 0.0            | 99.30%           |
| NHill_AD_C55553 | PREDICTED: gustatory receptor for sugar taste 64f-like<br>[Drosophila rhopaloa]                                      | 59%        | 4e-64          | 71.01%           |
|                 | unnamed protein product [Hermetia illucens]                                                                          | 63%        | 3e-95          | 99.32%           |
| NHill_AD_C58700 | PREDICTED: gustatory receptor for sugar taste 64f-like<br>[Drosophila rhopaloa]                                      | 25%        | 9e-12          | 79.55%           |
|                 | unnamed protein product [Hermetia illucens]                                                                          | 26%        | 1e-18          | 100%             |
| NHill_AD_C41107 | gustatory receptor for bitter taste 66a-like isoform X2<br>[Hermetia illucens]                                       | 86%        | 4e-117         | 98.82%           |
| NHill_AD_C17291 | gustatory receptor for bitter taste 66a [Hermetia illucens]                                                          | 32%        | 4e4e-28        | 96.77%           |
| NHill_AD_C8761  | putative gustatory receptor 28b isoform X3 [Hermetia illucens]                                                       | 100%       | 0.0            | 99.63%           |
| NHill_AD_C39103 | gustatory receptor [Eogystia hippophaecolus]                                                                         | 98%        | 4e-26          | 66.97%           |
| NHill_AD_C27799 | gustatory receptor 127 [Tribolium castaneum]                                                                         | 76%        | 2e-04          | 31.82%           |
|                 | unnamed protein product [Hermetia illucens]                                                                          | 58%        | 5e-29          | 79.10%           |

**Table S2c. Blastx analysis of *Hermetia illucens* gustatory receptor genes from adult transcriptome.** Each adult *H. illucens* contig sequence was manually checked with the BLASTX program from the National Center for Biotechnology Information (NCBI). For each sequence, the best matched protein was reported, with the respective Query Cover, the E-value and the Percentage of Identity.

**GLUTAMATE RECEPTORS**

| <b>CONTIG NAME</b> | <b>BLASTX</b>                                                                  | <b>QUERY COVER</b> | <b>E – VALUE</b> | <b>IDENTITY</b> |
|--------------------|--------------------------------------------------------------------------------|--------------------|------------------|-----------------|
| NHill_AD_C29958    | probable glutamate receptor [Hermetia illucens]                                | 99%                | 0.0              | 99.25%          |
| NHill_AD_C60142    | glutamate receptor ionotropic NMDA receptor 3 [Bradysia odoriphaga]            | 94%                | 7e-21            | 64.90%          |
|                    | uncharacterized protein LOC119661346 isoform X1 [Hermetia illucens]            | 99%                | 6e-50            | 99.30%          |
| NHill_AD_C53624    | probable glutamate receptor [Hermetia illucens]                                | 76%                | 2e-52            | 100%            |
| NHill_AD_C47020    | glutamate receptor ionotropic, kainate 2 isoform X2 [Hermetia illucens]        | 29%                | 4e-19            | 100%            |
| NHill_AD_C32005    | glutamate receptor ionotropic, kainate 2-like isoform X1 [Hermetia illucens]   | 99%                | 3e-40            | 98.94%          |
| NHill_AD_C37253    | glutamate receptor ionotropic, kainate 2 isoform X1 [Hermetia illucens]        | 72%                | 2e-160           | 100%            |
| NHill_AD_C6128     | glutamate receptor ionotropic, kainate 2 isoform X1 [Hermetia illucens]        | 71%                | 0.0              | 99.63%          |
| NHill_AD_C6794     | glutamate receptor ionotropic, kainate 1 isoform X3 [Hermetia illucens]        | 74%                | 0.0              | 100%            |
| NHill_AD_C39066    | glutamate receptor ionotropic, kainate 2 isoform X2 [Hermetia illucens]        | 40%                | 2e-128           | 100%            |
| NHill_AD_C16314    | glutamate receptor ionotropic, kainate 2 isoform X3 [Hermetia illucens]        | 96%                | 0.0              | 99.24%          |
| NHill_AD_C19616    | glutamate receptor ionotropic, kainate 2 isoform X1 [Hermetia illucens]        | 99%                | 3e-136           | 99.49%          |
| NHill_AD_C17391    | glutamate receptor ionotropic, kainate 2-like [Hermetia illucens]              | 91%                | 0.0              | 99.55%          |
| NHill_AD_C26460    | glutamate receptor ionotropic, kainate 2-like [Hermetia illucens]              | 93%                | 0.0              | 99.80%          |
| NHill_AD_C19042    | glutamate receptor ionotropic, kainate 2-like [Hermetia illucens]              | 95%                | 0.0              | 98.29%          |
| NHill_AD_C1262     | glutamate receptor ionotropic, kainate 2 isoform X1 [Hermetia illucens]        | 62%                | 0.0              | 99.69%          |
| NHill_AD_C17336    | glutamate receptor ionotropic, kainate 2-like isoform X2 [Hermetia illucens]   | 99%                | 6e-75            | 99.17%          |
| NHill_AD_C22050    | glutamate receptor ionotropic, kainate 2 [Hermetia illucens]                   | 80%                | 6e-96            | 79.28%          |
| NHill_AD_C78255    | PREDICTED: glutamate receptor ionotropic, kainate 2-like [Rhagoletis zephyria] | 97%                | 6e6-19           | 40.16%          |

|                 |                                                                                                                                   |            |                |                  |
|-----------------|-----------------------------------------------------------------------------------------------------------------------------------|------------|----------------|------------------|
| NHill_AD_C7692  | glutamate receptor ionotropic, kainate 2-like isoform X1 [Hermetia illucens]                                                      | 93%        | 0.0            | 99.82%           |
| NHill_AD_C67273 | glutamate receptor ionotropic, delta-2 [Bactrocera oleae]<br>uncharacterized protein LOC101463425 isoform X1 [Ceratitis capitata] | 79%<br>79% | 5e-27<br>1e-29 | 28.57%<br>31.63% |
| NHill_AD_C21662 | glutamate receptor ionotropic, kainate 2 [Hermetia illucens]                                                                      | 99%        | 5e-100         | 100%             |
| NHill_AD_C52327 | glutamate receptor ionotropic, delta-1 [Hermetia illucens]                                                                        | 99%        | 2e-50          | 100%             |
| NHill_AD_C26161 | glutamate receptor ionotropic, delta-1-like [Hermetia illucens]                                                                   | 89%        | 0.0            | 99.71%           |
| NHill_AD_C40776 | probable glutamate receptor [Hermetia illucens]                                                                                   | 99%        | 1e-150         | 98.70%           |

**Table S2d. Blastx analysis of *Hermetia illucens* glutamate receptor genes from adult transcriptome.** Each adult *H. illucens* contig sequence was manually checked with the BLASTX program from the National Center for Biotechnology Information (NCBI). For each sequence, the best matched protein was reported, with the respective Query Cover, the E-value and the Percentage of Identity.

| CHEMOSENSORY PROTEINS |                                                              |             |           |          |
|-----------------------|--------------------------------------------------------------|-------------|-----------|----------|
| CONTIG NAME           | BLASTX                                                       | QUERY COVER | E – VALUE | IDENTITY |
| NHill_AD_C35093       | chemosensory protein [Dioryctria abietella]                  | 57%         | 1e-65     | 89.91%   |
| NHill_AD_C3992        | ejaculatory bulb-specific protein 3-like [Hermetia illucens] | 40%         | 6e-73     | 100%     |
| NHill_AD_C12670       | chemosensory protein A 7a [Drosophila melanogaster]          | 46%         | 3e-12     | 35.00%   |
|                       | uncharacterized protein LOC119655481 [Hermetia illucens]     | 71%         | 7e-106    | 97.75%   |
| NHill_AD_C11820       | chemosensory protein 5 [Bradysia odoriphaga]                 | 39%         | 4e-55     | 59.22%   |
|                       | unnamed protein product [Hermetia illucens]                  | 53%         | 2e-164    | 99.17%   |

**Table S2e. Blastx analysis of *Hermetia illucens* chemosensory protein genes from adult transcriptome.** Each adult *H. illucens* contig sequence was manually checked with the BLASTX program from the National Center for Biotechnology Information (NCBI). For each sequence, the best matched protein was reported, with the respective Query Cover, the E-value and the Percentage of Identity.

| SENSORY NEURON MEMBRANE PROTEINS |                                                                            |             |           |          |
|----------------------------------|----------------------------------------------------------------------------|-------------|-----------|----------|
| CONTIG NAME                      | BLASTX                                                                     | QUERY COVER | E – VALUE | IDENTITY |
| NHill_AD_C14048                  | LOW QUALITY PROTEIN: sensory neuron membrane protein 2 [Hermetia illucens] | 50%         | 0.0       | 100%     |
| NHill_AD_C40885                  | sensory neuron membrane protein 1 [Hermetia illucens]                      | 100%        | 5e-83     | 99.32%   |

**Table S2f Blastx analysis of *Hermetia illucens* sensory neuron membrane genes from adult transcriptome.** Each adult *H. illucens* contig sequence was manually checked with the BLASTX program from the National Center for Biotechnology Information (NCBI). For each sequence, the best matched protein was reported, with the respective Query Cover, the E-value and the Percentage of Identity.

a

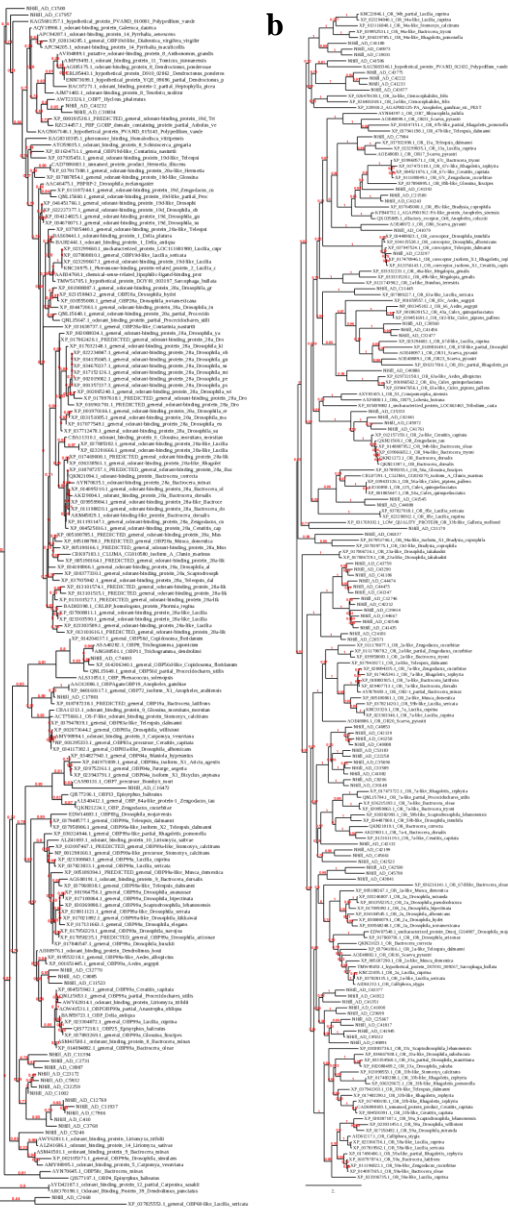

b

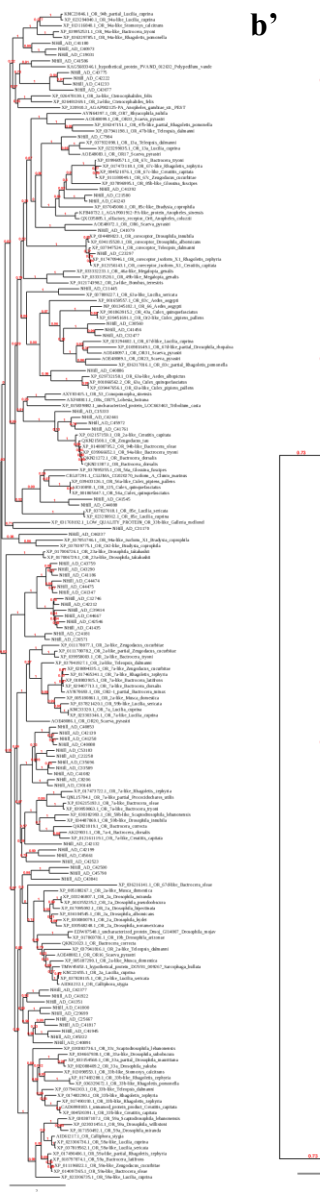

b'

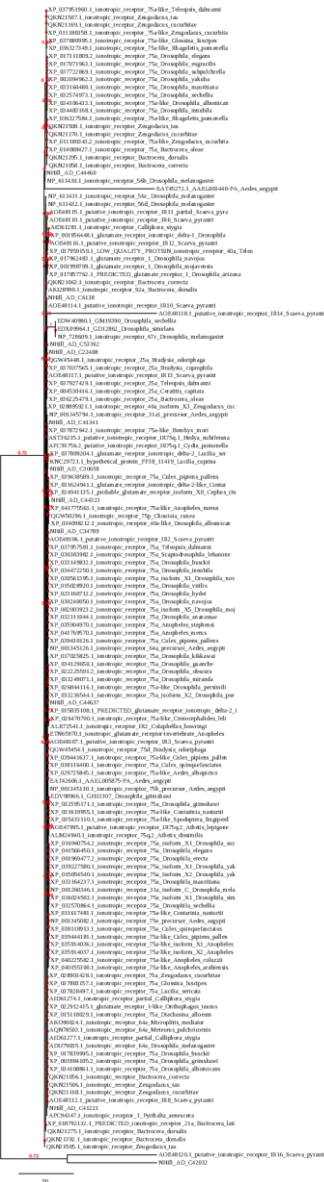

c

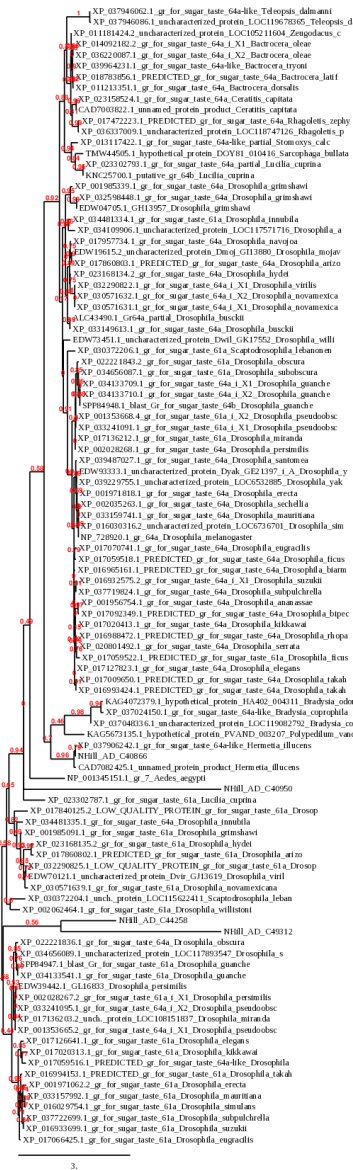

3.







**Figure S1: Phylogenetic trees of adult odorant binding proteins (a), olfactory receptors (b), ionotropic receptors (b'), gustatory receptors (c), glutamate receptors (d), chemosensory proteins (e), sensory neuron membrane proteins (f).** Phylogenetic trees were built with Phylogeny Analysis software (<http://www.phylogeny.fr/alacarte.cgi>). Each sequence of *H. illucens* were manually checked with Blastx software. For each *H. illucens* sequence, the most similar sequences of different species or genus were selected. The corresponding amino acid sequences of all the selected sequences were subsequently aligned with MUSCLE software and then the phylogenetic tree was built, using default parameters. *H. illucens* sequences are reported as the contig number, while sequences of other species are reported with the accession number, the name of the protein. The Arabic numerals at the branching points are bootstrap values.

| ODORANT BINDING PROTEINS |                                                                         |             |           |          |
|--------------------------|-------------------------------------------------------------------------|-------------|-----------|----------|
| CONTIG NAME              | BLASTX                                                                  | QUERY COVER | E – VALUE | IDENTITY |
| Hill_COMB-BB_C21691      | general odorant-binding protein 19d-like [Hermetia illucens]            | 66%         | 2e-95     | 99.29%   |
| Hill_COMB-BB_C13368      | general odorant-binding protein 19d-like [Hermetia illucens]            | 71%         | 3e-96     | 100%     |
| Hill_COMB-BB_C57         | general odorant-binding protein 99a-like [Hermetia illucens]            | 33%         | 2e-80     | 100%     |
| Hill_COMB-BB_C11107      | general odorant-binding protein 99a-like [Hermetia illucens]            | 66%         | 3e-81     | 97.79%   |
| Hill_COMB-BB_C31956      | general odorant-binding protein 19d-like isoform X1 [Hermetia illucens] | 74%         | 3e-89     | 100%     |
| Hill_COMB-BB_C4812       | odorant binding protein 15 [Holotrichia oblitera]                       | 99%         | 2e-08     | 40.48%   |
|                          | uncharacterized protein LOC119648416 [Hermetia illucens]                | 99%         | 1e-50     | 100%     |
| Hill_COMB-BB_C7755       | odorant-binding protein 50c [Bactrocera minax]                          | 86%         | 3e-38     | 35.37%   |
|                          | unnamed protein product [Hermetia illucens]                             | 97%         | 4e-175    | 97.30%   |
| Hill_COMB-BB_C31807      | general odorant-binding protein 66-like [Hermetia illucens]             | 93%         | 2e-112    | 98.74%   |
| Hill_COMB-BB_C42512      | unnamed protein product [Hermetia illucens]                             | 96%         | 6e-69     | 100%     |
|                          | general odorant-binding protein 66-like [Hermetia illucens]             |             | 9e-45     | 65.83%   |
| Hill_COMB-BB_C51370      | uncharacterized protein LOC119646539 [Hermetia illucens]                | 80%         | 6e-125    | 96.76%   |
|                          | general odorant-binding protein 66-like [Hermetia illucens]             | 75%         | 6e-31     | 39.43%   |
| Hill_COMB-BB_C45961      | unnamed protein product [Hermetia illucens]                             | 70%         | 3e-74     | 100%     |
|                          | general odorant-binding protein 68-like [Hermetia illucens]             | 68%         | 6e-32     | 48.57%   |
| Hill_COMB-BB_C441        | general odorant-binding protein 99a-like [Hermetia illucens]            | 57%         | 2e-90     | 100%     |
| Hill_COMB-BB_C758        | general odorant-binding protein 99b-like [Hermetia illucens]            | 65%         | 1e-83     | 95.38%   |
| Hill_COMB-BB_C768        | general odorant-binding protein 99a-like [Hermetia illucens]            | 80%         | 3e-109    | 98.84%   |
| Hill_COMB-BB_C1173       | general odorant-binding protein 99a-like [Hermetia illucens]            | 65%         | 5e-95     | 100%     |
| Hill_COMB-BB_C1844       | general odorant-binding protein 99a-like isoform X1 [Hermetia illucens] | 80%         | 1e-90     | 100%     |
| Hill_COMB-BB_C2633       | general odorant-binding protein 99b-like [Hermetia illucens]            | 64%         | 4e-87     | 96.15%   |
| Hill_COMB-BB_C3948       | general odorant-binding protein 99b-like [Hermetia illucens]            | 85%         | 6e-72     | 99.07%   |

|                     |                                                                         |      |       |        |
|---------------------|-------------------------------------------------------------------------|------|-------|--------|
| Hill_COMB-BB_C3962  | general odorant-binding protein 99b-like [Hermetia illucens]            | 90%  | 5e-73 | 83.33% |
| Hill_COMB-BB_C3982  | general odorant-binding protein 99a-like isoform X1 [Hermetia illucens] | 90%  | 3e-98 | 100%   |
| Hill_COMB-BB_C4168  | general odorant-binding protein 99a-like isoform X3 [Hermetia illucens] | 68%  | 4e-73 | 91.45% |
| Hill_COMB-BB_C5161  | general odorant-binding protein 99a-like isoform X3 [Hermetia illucens] | 85%  | 3e-72 | 90.60% |
| Hill_COMB-BB_C5826  | general odorant-binding protein 99b-like [Hermetia illucens]            | 98%  | 4e-55 | 97.70% |
| Hill_COMB-BB_C7404  | general odorant-binding protein 99b-like [Hermetia illucens]            | 96%  | 1e-77 | 81.02% |
| Hill_COMB-BB_C7621  | general odorant-binding protein 99b-like [Hermetia illucens]            | 76%  | 2e-94 | 99.26% |
| Hill_COMB-BB_C9011  | general odorant-binding protein 99a-like [Hermetia illucens]            | 80%  | 2e-91 | 100%   |
| Hill_COMB-BB_C13738 | general odorant-binding protein 99a-like [Hermetia illucens]            | 58%  | 2e-72 | 93.04% |
| Hill_COMB-BB_C14606 | uncharacterized protein LOC119655003 [Hermetia illucens]                | 86%  | 1e-84 | 99.19% |
|                     | general odorant-binding protein 99a-like [Hermetia illucens]            | 83%  | 6e-58 | 72.27% |
| Hill_COMB-BB_C15984 | general odorant-binding protein 99a-like isoform X2 [Hermetia illucens] | 90%  | 9e-51 | 63.41% |
| Hill_COMB-BB_C29339 | general odorant-binding protein 99b-like [Hermetia illucens]            | 87%  | 1e-62 | 92.31% |
| Hill_COMB-BB_C171   | general odorant-binding protein 99a-like [Hermetia illucens]            | 65%  | 1e-73 | 97.62% |
| Hill_COMB-BB_C363   | general odorant-binding protein 99a-like [Hermetia illucens]            | 87%  | 5e-93 | 100%   |
| Hill_COMB-BB_C1936  | general odorant-binding protein 99a-like isoform X2 [Hermetia illucens] | 82%  | 9e-52 | 70.09% |
| Hill_COMB-BB_C13737 | uncharacterized protein LOC119653464 [Hermetia illucens]                | 69%  | 5e-75 | 100%   |
|                     | general odorant-binding protein 99a-like [Hermetia illucens]            | 68%  | 4e-49 | 67.54% |
| Hill_COMB-BB_C3485  | odorant-binding protein 50c [Bactrocera minax]                          | 98%  | 7e-10 | 38.60% |
|                     | uncharacterized protein LOC119648416 [Hermetia illucens]                | 100% | 3e-51 | 97.39% |
| Hill_COMB-BB_C59460 | general odorant-binding protein 28a-like [Hermetia illucens]            | 71%  | 3e-97 | 95.45% |

**Table S3a. Blastx analysis of *Hermetia illucens* odorant binding protein genes from larval transcriptome.** Each larval *H. illucens* contig sequence was manually checked with the BLASTX program from the National Center for Biotechnology Information (NCBI). For each sequence, the best matched protein was reported, with the respective Query Cover, the E-value and the Percentage of Identity.

| IONOTROPIC RECEPTORS |                                                          |     |       |         |
|----------------------|----------------------------------------------------------|-----|-------|---------|
| Hill_COMB-BB_C13514  | uncharacterized protein LOC119653703 [Hermetia illucens] | 26% | 0.0   | 100%    |
|                      | ionotropic receptor 25a [Hermetia illucens]              | 10% | 4e-49 | 100.00% |

**Table S3b. Blastx analysis of *Hermetia illucens* ionotropic receptor genes from larval transcriptome.** Each larval *H. illucens* contig sequence was manually checked with the BLASTX program from the National Center for Biotechnology Information (NCBI). For each sequence, the best matched protein was reported, with the respective Query Cover, the E-value and the Percentage of Identity.

| GUSTATORY RECEPTORS |                                                                      |             |           |          |
|---------------------|----------------------------------------------------------------------|-------------|-----------|----------|
| CONTIG NAME         | BLASTX                                                               | QUERY COVER | E – VALUE | IDENTITY |
| Hill_COMB-BB_C54783 | gustatory receptor for bitter taste 66a [ <i>Hermetia illucens</i> ] | 71%         | 2e-174    | 99.22%   |

**Table S3c. Blastx analysis of *Hermetia illucens* gustatory receptor genes from larval transcriptome.** Each larval *H. illucens* contig sequence was manually checked with the BLASTX program from the National Center for Biotechnology Information (NCBI). For each sequence, the best matched protein was reported, with the respective Query Cover, the E-value and the Percentage of Identity.

| GLUTAMMATE RECEPTORS |                                                                                       |             |           |          |
|----------------------|---------------------------------------------------------------------------------------|-------------|-----------|----------|
| CONTIG NAME          | BLASTX                                                                                | QUERY COVER | E – VALUE | IDENTITY |
| Hill_COMB-BB_C17749  | glutamate receptor ionotropic, kainate 2-like [ <i>Hermetia illucens</i> ]            | 92%         | 0.0       | 99.77%   |
| Hill_COMB-BB_C37807  | glutamate receptor ionotropic, kainate 2-like isoform X1 [ <i>Hermetia illucens</i> ] | 98%         | 0.0       | 100%     |
| Hill_COMB-BB_C24498  | glutamate receptor ionotropic, kainate 1 isoform X3 [ <i>Hermetia illucens</i> ]      | 90%         | 0.0       | 100%     |
| Hill_COMB-BB_C36919  | glutamate receptor ionotropic, kainate 1 isoform X3 [ <i>Hermetia illucens</i> ]      | 95%         | 2e-142    | 100%     |
| Hill_COMB-BB_C24819  | glutamate receptor ionotropic, kainate 2-like isoform X1 [ <i>Hermetia illucens</i> ] | 95%         | 0.0       | 99.83%   |

**Table S3d. Blastx analysis of *Hermetia illucens* glutamate receptor genes from larval transcriptome.** Each larval *H. illucens* contig sequence was manually checked with the BLASTX program from the National Center for Biotechnology Information (NCBI). For each sequence, the best matched protein was reported, with the respective Query Cover, the E-value and the Percentage of Identity.

| CHEMOSENSORY PROTEINS |                                                                       |             |           |          |
|-----------------------|-----------------------------------------------------------------------|-------------|-----------|----------|
| CONTIG NAME           | BLASTX                                                                | QUERY COVER | E – VALUE | IDENTITY |
| Hill_COMB-BB_C6211    | chemosensory protein 5 [ <i>Bradysia odoriphaga</i> ]                 | 46%         | 2e-53     | 61.25%   |
|                       | unnamed protein product [ <i>Hermetia illucens</i> ]                  | 58%         | 3e-135    | 99.50%   |
| Hill_COMB-BB_C11757   | ejaculatory bulb-specific protein 3-like [ <i>Hermetia illucens</i> ] | 33%         | 2e-55     | 100%     |

**Table S3e. Blastx analysis of *Hermetia illucens* chemosensory protein genes from larval transcriptome.** Each larval *H. illucens* contig sequence was manually checked with the BLASTX program from the National Center for Biotechnology Information (NCBI). For each sequence, the best matched protein was reported, with the respective Query Cover, the E-value and the Percentage of Identity.

| SENSORY NEURON MEMBRANE PROTEINS |                                                                               |             |           |          |
|----------------------------------|-------------------------------------------------------------------------------|-------------|-----------|----------|
| CONTIG NAME                      | BLASTX                                                                        | QUERY COVER | E – VALUE | IDENTITY |
| Hill_COMB-BB_C25571              | LOW QUALITY PROTEIN: sensory neuron membrane protein<br>2 [Hermetia illucens] | 60%         | 0.0       | 99.09%   |

**Table S3f. Blastx analysis of *Hermetia illucens* sensory neuron membrane genes from larval transcriptome.** Each larval *H. illucens* contig sequence was manually checked with the BLASTX program from the National Center for Biotechnology Information (NCBI). For each sequence, the best matched protein was reported, with the respective Query Cover, the E-value and the Percentage of Identity.

a

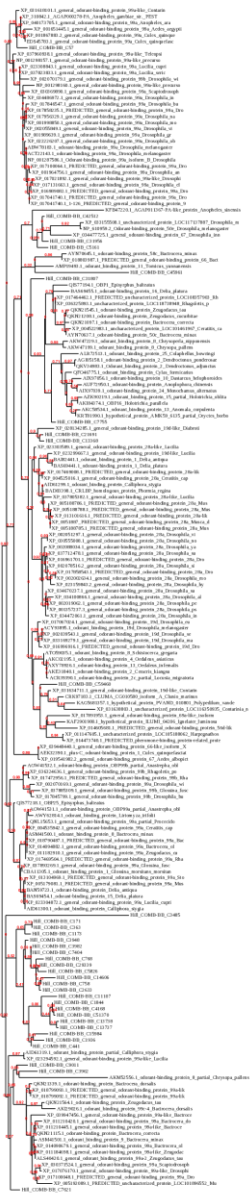

b

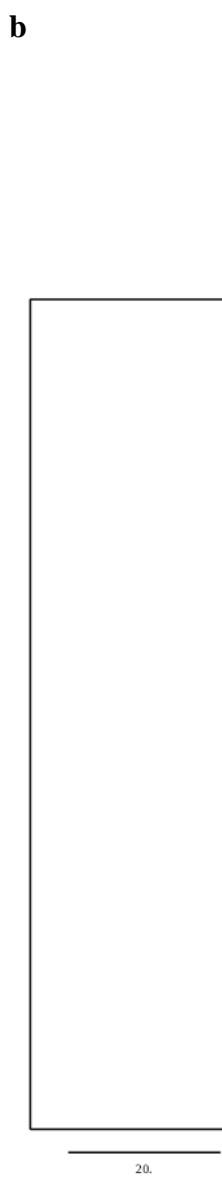

20.

AOE48117.1\_putative\_ionotropic\_receptor\_IR13\_Scaeva\_pyrastri  
 XP\_004530416.1\_ionotropic\_receptor\_25a\_Ceratitis\_capitata  
 XP\_03625479.1\_ionotropic\_receptor\_25a\_Bactrocera\_oleae  
 XP\_018787692.1\_PREDICTED\_ionotropic\_receptor\_25a\_Bactrocera\_jai  
 XP\_039951036.1\_ionotropic\_receptor\_25a\_Bactrocera\_oryzalis  
 XP\_011207795.1\_ionotropic\_receptor\_25a\_Bactrocera\_dorsalis  
 QKN21052.1\_ionotropic\_receptor\_25a\_Bactrocera\_correa  
 QKN21502.1\_ionotropic\_receptor\_25a\_Bactrocera\_tau  
 XP\_011178452.1\_ionotropic\_receptor\_25a\_Bactrocera\_cucurbitae  
 AMH85975.1\_alpha-amino-3-hydroxy-5-methyl-4-isoxazolepropionic\_a  
 XP\_037914503.1\_ionotropic\_receptor\_25a\_Hemella\_ilucens  
 XP\_026481386.1\_ionotropic\_receptor\_25a-like\_Ctenocephalides\_feli  
 XP\_036327744.1\_ionotropic\_receptor\_25a\_Rhagoletis\_pomondia  
 XP\_017467003.1\_PREDICTED\_ionotropic\_receptor\_25a\_Rhagoletis\_zeph  
 XP\_030383276.1\_ionotropic\_receptor\_25a\_Scaptozophila\_jebeonae  
 XP\_017063162.1\_ionotropic\_receptor\_25a\_Drosophila\_eugradis  
 XP\_002087966.1\_ionotropic\_receptor\_25a\_Drosophila\_yakuba  
 XP\_039494514.1\_ionotropic\_receptor\_25a\_Drosophila\_santonae  
 XP\_016955034.1\_PREDICTED\_glutamate\_receptor\_4\_Drosophila\_biamp  
 XP\_017060812.1\_PREDICTED\_glutamate\_receptor\_4\_Drosophila\_takahas  
 XP\_034125626.1\_ionotropic\_receptor\_25a\_Drosophila\_guanche  
 XP\_001962492.2\_ionotropic\_receptor\_25a\_Drosophila\_anassae  
 XP\_017095733.1\_PREDICTED\_glutamate\_receptor\_4\_Drosophila\_bipecti  
 XP\_041450746.1\_ionotropic\_receptor\_25a\_Drosophila\_obscura  
 XP\_034669677.1\_ionotropic\_receptor\_25a\_Drosophila\_subobscura  
 XP\_017025405.1\_ionotropic\_receptor\_25a\_Drosophila\_kikkawai  
 XP\_020802199.1\_ionotropic\_receptor\_25a\_Drosophila\_serrata  
 XP\_002037857.1\_ionotropic\_receptor\_25a\_Drosophila\_sechellia  
 EDW54275.1\_GM18071\_Drosophila\_sechellia  
 NP\_001260050.1\_ionotropic\_receptor\_25a\_isoform\_D\_Drosophila\_mela  
 XP\_016023464.1\_ionotropic\_receptor\_25a\_isoform\_X2\_Drosophila\_sim  
 NP\_001260049.1\_ionotropic\_receptor\_25a\_isoform\_C\_Drosophila\_mela  
 ACU43550.1\_IP13516p\_partial\_Drosophila\_melanogaster  
 XP\_016023465.1\_ionotropic\_receptor\_25a\_isoform\_X1\_Drosophila\_sim  
 XP\_033172979.1\_ionotropic\_receptor\_25a\_Drosophila\_maritima  
 NP\_001260051.1\_ionotropic\_receptor\_25a\_isoform\_E\_Drosophila\_mela  
 EDX03748.1\_GDR2688\_Drosophila\_simulans  
 XP\_001968713.2\_ionotropic\_receptor\_25a\_Drosophila\_erecta  
 XP\_016926130.1\_ionotropic\_receptor\_25a\_Drosophila\_suzuki  
 XP\_037708644.1\_ionotropic\_receptor\_25a\_Drosophila\_subpulchella  
 XP\_017117182.1\_ionotropic\_receptor\_25a\_Drosophila\_elegans  
 EDW28806.1\_GL18750\_Drosophila\_persimilis  
 XP\_017155329.1\_ionotropic\_receptor\_25a\_Drosophila\_miranda  
 XP\_001356575.4\_ionotropic\_receptor\_25a\_Drosophila\_subobscura  
 XP\_026844397.1\_ionotropic\_receptor\_25a\_Drosophila\_persimilis  
 XP\_017043976.1\_PREDICTED\_glutamate\_receptor\_4\_Drosophila\_ilucush  
 XP\_016969245.1\_PREDICTED\_glutamate\_receptor\_4\_Drosophila\_rhopalo  
 EDV99095.1\_GH13667\_Drosophila\_grimshawi  
 XP\_001993170.2\_ionotropic\_receptor\_25a\_Drosophila\_grimshawi  
 XP\_017857707.1\_PREDICTED\_ionotropic\_receptor\_25a\_Drosophila\_artz  
 XP\_034471715.1\_ionotropic\_receptor\_25a\_Drosophila\_bnnbila  
 XP\_023179885.2\_ionotropic\_receptor\_25a\_Drosophila\_hydel  
 XP\_030241382.1\_ionotropic\_receptor\_25a\_Drosophila\_novajola  
 XP\_002003805.2\_ionotropic\_receptor\_25a\_Drosophila\_mojavensis  
 XP\_002059248.2\_ionotropic\_receptor\_25a\_Drosophila\_virilis  
 XP\_030569025.1\_ionotropic\_receptor\_25a\_Drosophila\_novaxicana  
 XP\_034100384.1\_ionotropic\_receptor\_25a\_Drosophila\_albomicans  
 AL38173.1\_h25a\_Drosophila\_busckii  
 XP\_017839450.1\_ionotropic\_receptor\_25a\_Drosophila\_busckii  
 XP\_002066605.3\_ionotropic\_receptor\_25a\_Drosophila\_willstoni  
 AID61273.1\_ionotropic\_receptor\_Calliphora\_stygia  
 XP\_023298077.1\_ionotropic\_receptor\_25a\_Laelia\_cuprina  
 XP\_037809993.1\_ionotropic\_receptor\_25a\_Laelia\_soricata  
 XP\_013104244.1\_PREDICTED\_glutamate\_receptor\_ionotropic\_kainate\_4  
 NP\_001273813.1\_glutamate\_receptor\_ionotropic\_kainate\_4-like\_prec  
 XP\_03792429.1\_ionotropic\_receptor\_25a\_Teleopsis\_dalmanni  
 XP\_037883818.1\_ionotropic\_receptor\_25a\_Clossinia\_fuscespes  
 HILL\_COMB-BB\_C13514

c

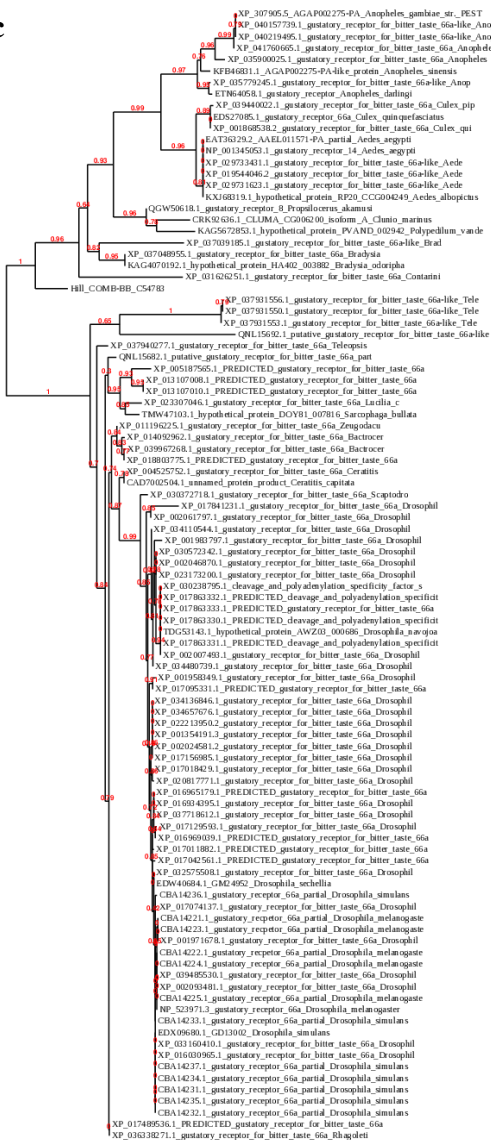

0.4

d

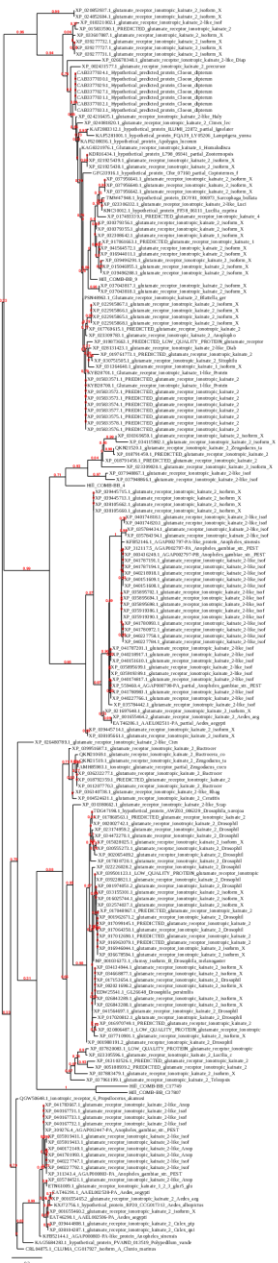

e

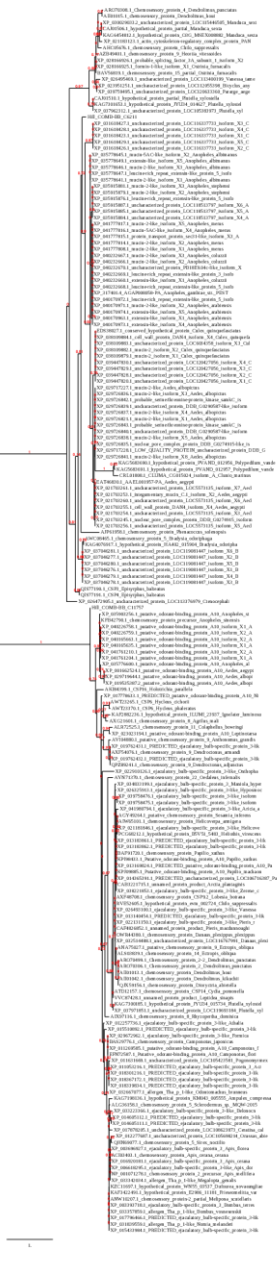

f

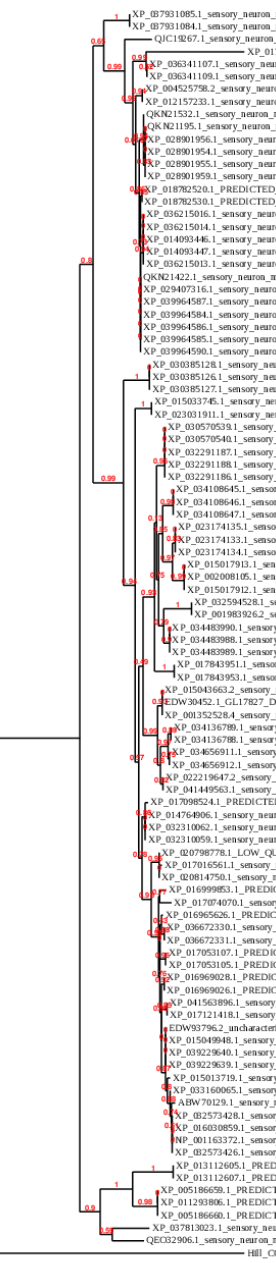

g

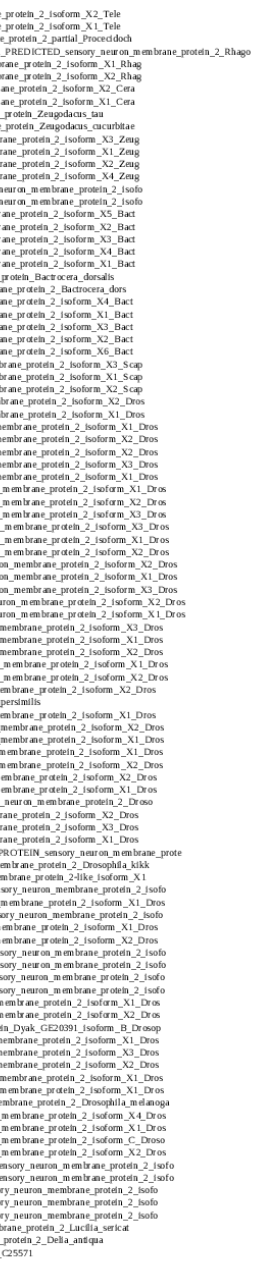

h

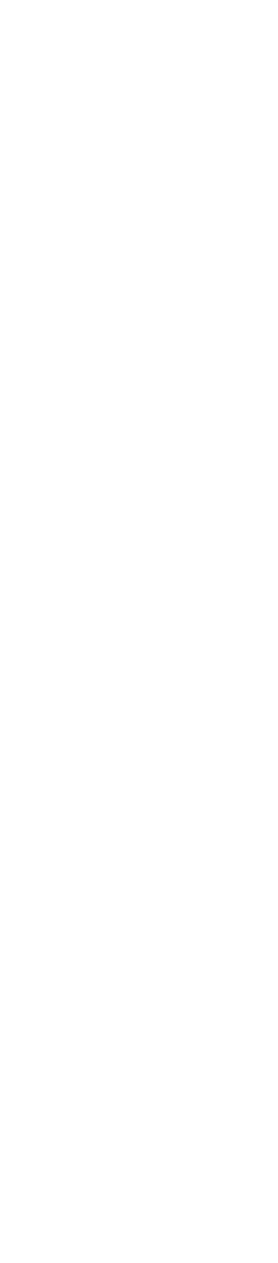

i



j

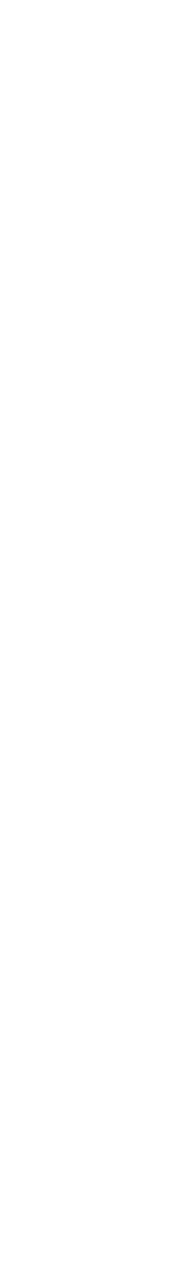



**Figure S2: Phylogenetic trees of larval odorant binding proteins (a), ionotropic receptors (b), gustatory receptors (c), glutamate receptors (d), chemosensory proteins (e), sensory neuron membrane proteins (f).** Phylogenetic trees were built with Phylogeny Analysis software (<http://www.phylogeny.fr/alacarte.cgi>). Each sequence of *H. illucens* were manually checked with Blastx software. For each *H. illucens* sequence, the most similar sequences of different species or genus were selected. The corresponding amino acid sequences of all the selected sequences were subsequently aligned with MUSCLE software and then the phylogenetic tree was built, using default parameters. *H. illucens* sequences are reported as the contig number, while sequences of other species are reported with the accession number, the name of the protein. The Arabic numerals at the branching points are bootstrap values.

| Contig sequence                                                                                                                                                                                                           | 5' end | 3' end | Signal peptide | Cystein pattern                                                                                                                                                                        |
|---------------------------------------------------------------------------------------------------------------------------------------------------------------------------------------------------------------------------|--------|--------|----------------|----------------------------------------------------------------------------------------------------------------------------------------------------------------------------------------|
| >41290<br>MARGTKATHDR <b>C</b> VAESGVTEEAIEEFSDGEIQEDEALK <b>CYMYC</b><br>VFNATDVLHEDGEVHLEKILDSLPDSMHEIAVHMGKK <b>CLCPKG</b><br>DTEWERAFLHK <b>C</b> WKQADPKHYFFF                                                        | Open   | Closed | Not evaluable  | 6 cysteines in the mature part of the protein.<br>The cysteine pattern is not conserved, except for 3 aminoacids between C2 and C3.<br>Being incomplete at 5 'it cannot be classified. |
| >42622<br>FRINFEYKEEFNNSGSLPDETDTPM <b>C</b> YETDTPMAQVLNNGII<br>DEFKVTSLGPGASGDSVEV <b>C</b> QAEGDEEQHP <b>C</b> KKAYAIK <b>C</b> MMI                                                                                    | Open   | Closed | Not evaluable  | 4 cysteines in the mature part of the protein.<br>The cysteine pattern is not conserved.<br>Being incomplete at 5 'it cannot be classified.                                            |
| >41232<br>MNCFASVFVIVAALFAVSQANVNDPKLKSILEQ <b>C</b> IGSEKASPAD<br>IAALEARSSDLSKEAK <b>C</b> VIS <b>C</b> VMKNYKLLSDDGKVNRDVFMAE<br>AEEMTKGDAGAMKEAGEMFEI <b>C</b> SAKTVADP <b>C</b> ESAFNFGH <b>C</b> MK<br>TEMTARNIPMDF | Closed | Closed | 0.9978         | 6 cysteines in the mature part of the protein.<br>The cysteine pattern is conserved.<br>Classic OBP.                                                                                   |
| >30834<br>MNRFASVFVIVAALAALSQADVNDPRLKASLEK <b>C</b> IGSEKASPA<br>DVEALKAHSSDLSREAQ <b>C</b> VMA <b>C</b> VMKEFKLLGDDGKINRDVY<br>MAEAEEMAKGDAGAIKQATEMYDI <b>C</b> SAKTVADN <b>C</b> ESANNFG<br>Q <b>C</b> IKNEMIARNIPLDM | Closed | Closed | 0.998224       | 6 cysteines in the mature part of the protein.<br>The cysteine pattern is conserved.<br>Classic OBP.                                                                                   |
| >54152                                                                                                                                                                                                                    | Open   | Closed | Not evaluable  | 1 cystein in the mature part of the protein.                                                                                                                                           |

|                                                                                                                                                                                |        |        |               |                                                                                                                                                       |
|--------------------------------------------------------------------------------------------------------------------------------------------------------------------------------|--------|--------|---------------|-------------------------------------------------------------------------------------------------------------------------------------------------------|
| ALAKSSAFRLWFLYPDLSFSVWLIGAPTAETAQISIRPRANVD<br>NIFGQTENDKSGSKNPKRNAEDLASDANDEADVGMNLPEIMSI<br>C KESFRINF EYKEEFNNSLSLPD                                                        |        |        |               | Being incomplete at 5' it cannot be classified.                                                                                                       |
| >42252<br>MVARGLILICAVAAAVGAPLSKTENDKSGPKNHKRNAEDSASA<br>ANDEADVGMNLQEIMSSCNESFRINCEYMQEFNKSGSLPDETD<br>KTPMC FMR CVLEQAQ                                                      | Open   | Open   | 0.9774        | 4 cysteines in the mature part of the protein.<br>The cysteine pattern is not conserved.<br>Being incomplete at 3' it cannot be classified.           |
| >18886<br>MGYLLKFFILVILSYSYGHKTQPRRDDEYPPKEMIRAIMTLHNI<br>C VAKTGVTEEAIKEFSDEIHEDEALKCYMNC LFHEAGLVNDD<br>GQVDLEMLYAMLDPNLKEIALNMGKQC MTPQGDNLCEKAW<br>WFHQ CWKKADPKHYFLV      | Closed | Closed | 0.9274        | 6 cysteines in the mature part of the protein.<br>The cysteine pattern is conserved.<br>Classic OBP                                                   |
| >23028<br>QNKDKTEIRTEVTKCSDKKEQKSDDCTWAYRGFKCFLSKHLQ<br>VVQSSVKP                                                                                                               | Open   | Open   | Not evaluable | 3 cysteines in the mature part of the protein.<br>The cysteine pattern is not conserved.<br>Being incomplete at 5' and at 3' it cannot be classified. |
| >2668<br>MSVRKVSGIAFAVGLLVILAVDVQAKLDGKKVRAFTANIAKA<br>C QPKTTPFGEIHEIIGKGKPTAEEKCFITCAITKGGLLSNNGEFQP<br>DGIKKINEAMREFDDNPAEYKNIDEVHIANCGGIEKPEKCDKGY<br>AIAEC SLKAFIDVHGNIF  | Open   | Closed | 0.9301        | 6 cysteines in the mature part of the protein.<br>The cysteine pattern is conserved.<br>Classic OBP.                                                  |
| >2226<br>MKVLVLLAVIGVAAATYTIKTHDDLKTRGLCVKELNVPDNYV<br>EKFKKWDFQDDETTCCYIKCVLNKMELFDTANGFNVENLVEQ<br>LGQNKDKTEVRTEVTKCSDKNEQKSDDCTWAYRGFKCFLSKH<br>LQLVQSSVKS                  | Closed | Closed | 0.9936        | 6 cysteines in the mature part of the protein.<br>The cysteine pattern is conserved.<br>Classic OBP.                                                  |
| >5246<br>MRSLFGLSFLLCVVFGTWVPKNREEIC KDRKECIKEANLSKSNL<br>DLVMQDAFGAEFPLNDELNRYIYCMGEKSELWEMGTMDANID<br>RVYEVFHALGYDVNKDDLEKCFVPIFDVSYVWAGRSIKCLW<br>DKKLIRRKAGCSCGNEPTATGQHAK | Closed | Closed | 0.9617        | 7 cysteines in the mature part of the protein.<br>The cysteine pattern is not conserved.<br>Plus OBP.                                                 |
| >16472                                                                                                                                                                         | Closed | Open   | 0.9835        | 7 cysteines in the mature part of the protein.                                                                                                        |



|                                                                                                                                                                                                                                                                            |        |        |               |                                                                                                                                                   |
|----------------------------------------------------------------------------------------------------------------------------------------------------------------------------------------------------------------------------------------------------------------------------|--------|--------|---------------|---------------------------------------------------------------------------------------------------------------------------------------------------|
| MTKVRAVTLLLICNYAVLAQSSDSLTTWPKLIRYAKQCGGVDI<br>LKDGFMTSLNADRQQKCFISCVARKLGILTPDRKVNLSARRV<br>FETLGLNPEQEKSAAAIQDCYITDADECEV                                                                                                                                                |        |        |               | The cysteine pattern is not conserved.<br>Being incomplete at 3' it cannot be classified.                                                         |
| >11937<br>MKYFFVQNEASGGALCSSDFALFQVHAHWKPKTLEEWQARA<br>ECFESEKVS LNQEEIMSDEYPHNPGCYFR CIGLKTGTRDDKNG<br>YNINSGYETLMSTVWEVRKDSASPQIRMMIRAGGLQLL                                                                                                                             | Closed | Closed | No            | 5 cysteines in the mature part of the protein.<br>The cysteine pattern is not conserved.<br>Being without signal peptide it cannot be classified. |
| >11394<br>MKLFLVFWTIFALVSAEWVPRSDQMYKDQAE CFKQLELTEEE<br>QQKVKKEDFPDEPKFR CYLR CILMGGQIWDDEKGYNPERAYA<br>ELLNIDMTADVENLRK CNTQNLHHSDC TRAFRVVKCFANN<br>YITSIKPKS                                                                                                           | Closed | Closed | 0.999         | 6 cysteines in the mature part of the protein.<br>The cysteine pattern is conserved.<br>Classic OBP.                                              |
| >1500<br>MTTFRKNTIFTFALVLFYGLAVTSVKAELDEARAKEFFIKVASE<br>CITDDIKEDDIEALMKDDASHEGK CLIA CLMKKLGVL DENG<br>LSPAGVNDIREKMQSFGGDSEKGHQIATAILEKCSNLKEEDECE<br>TAYQIHQ CARGEIKAIRG                                                                                               | Closed | Closed | 0.8226        | 6 cysteines in the mature part of the protein.<br>The cysteine pattern is conserved.<br>Classic OBP.                                              |
| >17009<br>TLFRSGKLFLILVAILIGITEALKCRNNDGPSEEKMKRVARS CM<br>KKVSNVQDGDSDYYEDRGGFDRGNNSQKRGRDQLGERRH<br>SRVLSRDDYGRQRYNHFGNLRNPGTSERHQHQVNSGPNRHS<br>NDKISYGNRGNQNDKSC VVHC FFEELNMLNNQDFPDKHKVTY<br>VITRDIRDNELREFYADSIQECFRFIEAERQRDKCQFSKDLIN CM<br>AEYARANC EDWYNHTMIFNN | Open   | Closed | 0.9967        | 7 cysteines in the mature part of the protein.<br>The cysteine pattern is not conserved.<br>Plus OBP.                                             |
| >74693<br>MKT LAIFLVI CIVGAFASLTDDQKAKLREHRDA CIAETGV DKA<br>VIDGITKGGPITRDSKLD CYSAC LLKKIKIMKDDGTIDLEATRAK<br>AATVNADPEKVKKVIEKCKDLTGKDTCEKGGNILACFIENKEF<br>PVLN                                                                                                        | Open   | Closed | 0.9984        | 6 cysteines in the mature part of the protein.<br>The cysteine pattern is conserved.<br>Classic OBP.                                              |
| >4062<br>MEFETTKALLKEGNHPYNNNNNRWRNNPCWIRALK CERAFW<br>LHK CWKQADPKHYFIFEKIRRRHWT                                                                                                                                                                                          | Closed | Open   | Not evaluable | 3 cysteines in the mature part of the protein.<br>The cysteine pattern is not conserved.<br>Being incomplete at 3' it cannot be classified.       |

|                                                                                                                                                                                                                    |        |        |               |                                                                                                                  |
|--------------------------------------------------------------------------------------------------------------------------------------------------------------------------------------------------------------------|--------|--------|---------------|------------------------------------------------------------------------------------------------------------------|
| >17957<br>MAKLGLTSILLVIFVCISAGLDEDPI SIVTEVPDDSEL RVI AKK CK<br>IPGV<br>SDEEIERMLNDDTNLSYGGK CTLK CIAENIGVVIKDDQMDIAET<br>KKIVEESA VDKEELAMPFY LIDK GEIKDKDE CELAYKLNLCMI<br>EATKEWNSNSTSDDL                       | Closed | Closed | 0.9942        | 6 cysteines in the mature part of the protein.<br>The cysteine pattern is conserved.<br>Classic OBP.             |
| >75784<br>MPDLIPVATEAIEK GEIIRAKMEKGKDRKPQGDDQ CHHVPSM<br>YAG CFFAQT TIN CPDSAWQD TDD CNRAREFMKS CPMPHRPKE                                                                                                         | Open   | Closed | Not evaluable | 6 cysteines.<br>The cysteine pattern is not conserved.<br>Being incomplete at 5' it cannot be classified.        |
| >61546<br>MFRDLSVFLV CVFVVQ CLADPD CSEPPKKKDFMG CKKPEALS<br>EIITK CSEKYPFEHRRPNIC YGE CVFNETGLAVDGV IQRDKISSVI<br>GEFYKDMP                                                                                         | Open   | Open   | 0.9992        | 8 cysteines.<br>The cysteine pattern is not conserved.<br>Being incomplete at 5' and 3' it cannot be classified. |
| >43028<br>MPLPTTYFRGCLFLFLVAVFAEDH C SKPPPKFAPRE CCEPVKWS<br>ESNVEDK CAGAPSAV CFTE C IFNSTDIIQNDGPNATNIRTFEIEL<br>KADPDYIPIAINNFEM CYSLVKRRMEDKDHQIDG CDTFPALIME<br>CTIAQMFVD C PSEKWKSS EAC ELARKYYKR C PDRHFTTNA | Open   | Closed | 0.9971        | 12 cysteines.<br>The cysteine pattern is not conserved.<br>Atypical OBP.                                         |
| >73118<br>MNAVQT CYTFVTQKMKNKNEKVG G C SVLPSLVSE C TDTQIFV<br>N CPANKWKS NQL C DSAKAYLKK C PVLNFP MNN                                                                                                              | Open   | Closed | Not evaluable | 6 cysteines.<br>The cysteine pattern is not conserved.<br>Being incomplete at 5' it cannot be classified         |
| >56633<br>LEALQKDVT CVAECVGKKFGVLDEAGNVKHDVFLAHLKTKV<br>QDSEWKLKVSDSIAEK CIEETKKEVEGHI AKRDVTSQKAC NPTS<br>LKISQ CLWREYVMA C PKDLQVDSPK C NKLREKIDKGDAV                                                            | Open   | Open   | Not evaluable | 6 cysteines.<br>The cysteine pattern is not conserved.<br>Being incomplete at 5' and 3' it cannot be classified. |
| >12724<br>VQIVADPSCLNPPPNNFITS CC VRNGHLRDIVAK C NEMIPAETA<br>ARSF CHAEC VFNETGLSANNVIQHDKMVEVTKDLFKDTTFEMP<br>VIDAAVKK CKGVAEAKLVKINEIKLDGADK CHPLPALIMS CFL<br>AELFIN CPASLWQNT EEC TQAKMFM TV C IMN             | Open   | Closed | Not evaluable | 11 cysteines.<br>The cysteine pattern is not conserved.<br>Plus OBP.                                             |
| >32770                                                                                                                                                                                                             | Closed | Closed | 0.998         | 6 cysteines in the mature part of the protein.                                                                   |

|                                                                                                                                                                                                                                                   |        |        |               |                                                                                                         |
|---------------------------------------------------------------------------------------------------------------------------------------------------------------------------------------------------------------------------------------------------|--------|--------|---------------|---------------------------------------------------------------------------------------------------------|
| MKVFIVLFA <sup>C</sup> IILGSADDWKPKSKEEALQIREE <sup>C</sup> CLKLNNVPAPL<br>VEKVKKFEYEDEESVR <sup>C</sup> HIK <sup>C</sup> TAEKVGVDNVKGYDVDRLY<br>DQVVIKEEVATNKDDLKK <sup>C</sup> IDDKHDGEDD <sup>C</sup> TWAYRNFK <sup>C</sup> ML<br>DNKYLTCCA    |        |        |               | The cysteine pattern is conserved.<br>Classic OBP.                                                      |
| >410<br>MKILISLFAIFVLVTADWEPRNREQFIKDRDE <sup>C</sup> FKSENLSH <sup>C</sup> ID<br>EIKRRIFPHEPK <sup>C</sup> YFR <sup>C</sup> VLMKNSVWDDTSGYDVEKAYKELTHN<br>GLEIAKEDLNK <sup>C</sup> NSDEMKNKDP <sup>C</sup> VWANNIHK <sup>C</sup> IWDYLPKKKQ<br>D | Closed | Closed | 0.9957        | 7 cysteines in the mature part of the<br>protein.<br>The cysteine pattern is conserved.<br>Plus OBP.    |
| >56175<br>ASAFNKEQFLKNREE <sup>C</sup> CLKSEKVPEAVIEKLKNRQYGEDLGHEA<br>K <sup>C</sup> YIR <sup>C</sup> LALKSGTWDDAKGYDLEKAYEDLQSAGLEVSKENLK<br>K <sup>C</sup> ISSNPDNDDK <sup>C</sup> TWAAKDLK <sup>C</sup> LWTNKYISRSEER                         | Open   | Open   | Not evaluable | 6 cysteines in the mature part of the<br>protein.<br>The cysteine pattern is conserved.<br>Classic OBP. |
| >23172<br>MKFFIVLCAVIAMAAAQWTPKSKEELLKFREE <sup>C</sup> FKSENVPPAV<br>IEKLNNRQYDEDLGQEAR <sup>C</sup> YIR <sup>C</sup> IGLKSEIWDDTNGYDLERSY<br>QNLSTGFVSKENLQK <sup>C</sup> ITPNTDNDDK <sup>C</sup> TWAAKNLK <sup>C</sup> LWTN<br>KYVTKKQ         | Open   | Closed | 0.9985        | 6 cysteines in the mature part of the<br>protein.<br>The cysteine pattern is conserved.<br>Classic OBP. |
| >8085<br>MKLFVVLAAIVAFASAEWATRSPAELAQSRLS <sup>C</sup> IQELSPANLV<br>EQIKKFQYPDEEIVR <sup>C</sup> YIR <sup>C</sup> TSEKIGIWSDDSGFITDRVIEQLAGN<br>RDKDAFRADVLRK <sup>C</sup> IDSNEQKSDK <sup>C</sup> TWAYRNFNC <sup>C</sup> FIKNNLILVQ<br>SQINASS  | Closed | Closed | 0.9986        | 6 cysteines in the mature part of the<br>protein.<br>The cysteine pattern is conserved.<br>Classic OBP. |
| >1903<br>MKLLIALCTVFALVQAWAPSTFEEYLNYRKE <sup>C</sup> CFVSENISKDDQ<br>DLLNKGLYPTKPG <sup>C</sup> YYR <sup>C</sup> NGLKTGIWDDVNGYSVDRGYELLT<br>AEGWEVTKDSLRRK <sup>C</sup> NTPDKKDADL <sup>C</sup> KWSAAVAK <sup>C</sup> LWGNVLI<br>KRKDA          | Closed | Closed | 0.9995        | 6 cysteines in the mature part of the<br>protein.<br>The cysteine pattern is conserved.<br>Classic OBP. |
| >32259<br>MKLFIALCAVIASAAAFNKEEFLKMREE <sup>C</sup> CLKSEKVPAAIEKL<br>KHREYEQDLGHEAK <sup>C</sup> YIR <sup>C</sup> MGLKTGVWDDTHGYNVDKTYDD<br>FHSAGLEVSKDNLKK <sup>C</sup> FTSHGDDDK <sup>C</sup> VWAAKDVK <sup>C</sup> LWTNKY<br>VTIKKDLFE        | Open   | Closed | 0.9978        | 6 cysteines in the mature part of the<br>protein.<br>The cysteine pattern is conserved.<br>Classic OBP. |
| >11523<br>MKFFVASCVLLAVASAQWAPKTGKEVAQIREDC <sup>C</sup> VKEENVPE<br>LAEGLKKFEYPDEEPIR <sup>C</sup> YVK <sup>C</sup> VSAKLGVWNETGFDADRVA                                                                                                          | Closed | Closed | 0.9986        | 6 cysteines in the mature part of the<br>protein.                                                       |

|                                                                                                                                                                                        |        |        |               |                                                                                                        |
|----------------------------------------------------------------------------------------------------------------------------------------------------------------------------------------|--------|--------|---------------|--------------------------------------------------------------------------------------------------------|
| DQVKQDRNKDDIKAEEVEKCIDKNEQNSDKCTWAYRNLKCVMDKKLLQVESLIAN                                                                                                                                |        |        |               | The cysteine pattern is conserved.<br>Classic OBP.                                                     |
| >3768<br>MKLLIFLFAIFVLVAADWKPRSREQYTKDGDECFKSENISEDGIHEIRR<br>HVFTDDSKCFFRCVLMKNHVVDDTTGYNVERVYKEVTHIGLKASKD<br>GLTQCNSDDKKDKDPCQWVNNIVRCVFEHNYIEPNY                                   | Open   | Closed | 0.9972        | 6 cysteines in the mature part of the protein.<br>The cysteine pattern is conserved.<br>Classic OBP.   |
| >2731<br>MKCSLVCFLLVFAIASGSDWEPKGNEELVSIRDECFKLENVSEE<br>SAAKILKNEYDPDEPSVHCYVRC TSAKVGTDWDEAGPDIDRTLRL<br>QIQKSGNTITREELVRCCKPEKQENKCLWAYKGLMCLKSEGIKD<br>DLIK                        | Closed | Closed | 0.9987        | 6 cysteines in the mature part of the protein.<br>The cysteine pattern is conserved.<br>Classic OBP.   |
| >1002<br>MKFFIVLCAIIAMASAI STEEFQKMREECFKSEKVPEADIEKLKN<br>REYGLDLGHEAKCYIRCLGMKTGNWDDTNGYDVEKIYTDFT<br>AGLEVTKENLNKCFKSSGDDDKCVWAAKDLKCLWTKYISRK<br>Q                                 | Open   | Closed | 0.9993        | 6 cysteines in the mature part of the protein.<br>The cysteine pattern is conserved.<br>Classic OBP.   |
| >1003<br>MKFFIVLCAIIAMAFAI STEEFQEMREECFKSEKVPEADIEKLKH<br>REYGLDLGHEAKCYIRCLGMKTGNWDDTNGYDVEKIYTDFT<br>AGLEVTKENLKKCFKSSGDDDKCVWAAKDLKCLWTKYISRK<br>Q                                 | Open   | Closed | 0.9988        | 6 cysteines in the mature part of the protein.<br>The cysteine pattern is conserved.<br>Classic OBP.   |
| >32362<br>FIIFWAIFAIAAADWKPPTMEELAKYREECIKEEKVPEQHAEGIR<br>KHGYFETVNIDSCFIHCMALKTGIRDKGPGYNLDRVYETLKV<br>L NKEVSKSDLYDMTFSMNRNLCAEDAVGMKRIWNKLQEAKKE<br>RESRMHPTECGIVHHSRLAYRRIHIGEKPS | Open   | Closed | Not evaluable | 5 cysteines in the mature part of the protein.<br>The cysteine pattern is not conserved.<br>Minus OBP. |
| >12769<br>MKFLVVFCVAVLVHAVWKPM TSEEWAKHRAECFESEKISQH<br>CQEEIKRGEFPPEPGCYFRCLGLKAGMWDDTHGFNMERSHDSL<br>TANGWEVDKDNLKKCYSANQKDNDPCKWAAAIACMFDNE<br>YLKKKA                               | Closed | Closed | 0.9933        | 6 cysteines in the mature part of the protein.<br>The cysteine pattern is conserved.<br>Classic OBP.   |
| >5932<br>MKLFILFAIMATASAI PKKYLYREECFKSEKVPAVVIEKLNN<br>PQYEEDMGHEAKCFIRCMALKIGSWDDTNGYNIDKTYADFQD<br>GGLEVSKENMKKCFTSNPDNDDKCVWADKDLKCLYRNKYVT<br>HKYSIN                              | Closed | Closed | 0.9989        | 6 cysteines in the mature part of the protein.<br>The cysteine pattern is conserved.<br>Classic OBP.   |

|                                                                                                                                                             |        |        |               |                                                                                                                                                    |
|-------------------------------------------------------------------------------------------------------------------------------------------------------------|--------|--------|---------------|----------------------------------------------------------------------------------------------------------------------------------------------------|
| >9042<br>LVQADWTKAPEDLIKDRLECFESEKVSHHCEQEIKKGEFPHE<br>PGCYRCLIGLKSGIWDDTNGFNIERGIASFATGWVVEKDNLK<br>KCTTDDQKNDDPCKWSAAIAKCLFDNKYLKRKA                      | Open   | Closed | Not evaluable | 7 cysteines in the mature part of the protein.<br>The cysteine pattern is not conserved.<br>Plus OBP.                                              |
| >70911<br>MATAYTKEDFLKDREECLKSEKVPEAVIEKLKNRQYDGDGLGH<br>EAQCYIRCLAVKVGSFDDATGYDLDKTYSHLTSAGFVVTKENL<br>KKCISAAPADGDKCAWAAKDLKCLWTNKYISKKQ                  | Open   | Closed | Not evaluable | 6 cysteines in the mature part of the protein.<br>The cysteine pattern is not conserved.<br>Being incomplete at 5' and 3' it cannot be classified. |
| >8987<br>MKSLIIFCAIFAVVFANWSTPTKEQFKQHRDDCLKEGNVPEETA<br>NKIRKEQYPNDRDTYCYIRCVGSKSGIWDRKGYDIDRALQVF<br>EANGYEVTRENLERCFAPLPGADCTWAGVNMRLRDNKYVT<br>KKASA    | Closed | Closed | 0.9973        | 6 cysteines in the mature part of the protein.<br>The cysteine pattern is conserved.<br>Classic OBP.                                               |
| >7966<br>MKVLLVFC AVLALVYADWKPKTLEEWVKNRAECFESEKVSQ<br>HCQEEIKRGEYPHEPGCYFRCTGKTGIWHD TNGFDIEKGHEAL<br>VATGWEVEKDNLKKCTSANPKEDDPCKWSAAIAKCMFDNKY<br>LKRKE   | Closed | Closed | 0.9994        | 7 cysteines in the mature part of the protein.<br>The cysteine pattern is conserved.<br>Plus OBP.                                                  |
| >61431<br>MKLFIVFWAIFAIATADWKPPTMEELSKYREECIKEEEVPEREA<br>EEIRKHDYFENVPLNHCFIQCMGEKTGIRESRRTFDLDRVYETF<br>KVLNNELSRKDFDENHFDARRSGCIEDGIYMRFIWSTIQERSGL<br>K | Open   | Closed | 0.9987        | 4 cysteines in the mature part of the protein.<br>The cysteine pattern is not conserved.<br>Minus OBP.                                             |
| >17801<br>SLIIPHICIYLLQVTDEQMKKSAQMLRDVCPQKFKISDEVANGIK<br>DGIIPDEQNVKCYINCVLEMMNSIKKGKLN YEASVKQIDLLLPD<br>RLKDSFKAGLAACRNSIDGIRNHCEAATVLLKCLKANIP EFFFFP  | Open   | Closed | Not evaluable | 6 cysteines in the mature part of the protein.<br>The cysteine pattern is conserved.<br>Classic OBP.                                               |
| >76148<br>DDIMSGKKFTPSRELD CYAACIFKKNGMMKPDGTIDQDKPSKT<br>EEAKECKKLSGADECETAGKVMGCFAKHNLPKM                                                                 | Open   | Closed | Not evaluable | 5 cysteines in the mature part of the protein.<br>The cysteine pattern is not conserved.                                                           |

**Table S4.** analysis of the OBP sequences from adult transcriptome, searching for complete sequence at 5' and 3' ends, the presence of the signal peptide with SignalP-5.0 software (<http://www.cbs.dtu.dk/services/SignalP/>) and the conserved cysteine pattern. In some cases, although the Expasy-Translate Tool

software highlights the longest frame beginning with a methionine, comparing the sequence with similar proteins in known databases (NCBI protein database), it was possible to indicate the correct frame. In some cases. the frame is not complete at 3' or at 5' ends and comparing it with similar *H. illucens* proteins or with similar sequences in known protein databases (NCBI protein database), it is possible to confirm that the sequence from the transcriptome is or is not complete and if it includes or not includes the entire mature peptide.

| Contig sequence                                                                                                                                                                | 5' end | 3' end | Signal peptide | Cystein pattern                                                                                      |
|--------------------------------------------------------------------------------------------------------------------------------------------------------------------------------|--------|--------|----------------|------------------------------------------------------------------------------------------------------|
| >21691<br>MNCFASVVFVIVAALVAVSQANVNDPKLKSILEQ[CIGSEKASPAD<br>IAALEARSSDLSKEAK[CVIS[VMKKNYKLLSDDGKVNRDVFMAE<br>AEEMTKGDAGAMKEAGEMFEI[CSAKTVADP[CESAFNFGH[CMK<br>TEMTARNIPMDF     | Closed | Closed | 0.9978         | 6 cysteines in the mature part of the protein.<br>The cysteine pattern is conserved.<br>Classic OBP. |
| >13368<br>MNRFASVVFVIVAALAALSQADVNDPRLKASLEK[CIGSEKASPA<br>DVEALKAHSSDLSREAQ[CVMA[VMKEFKLLGDDGKINRDVY<br>MAEAEEMA[KGDAGAIKQATEMYDI[CSAKTVADN[CESANNFG<br>Q[CIKNEMIARNIPLDM     | Closed | Closed | 0.9982         | 6 cysteines in the mature part of the protein.<br>The cysteine pattern is conserved.<br>Classic OBP. |
| >57<br>MKVLVLLAVIGVAAATYTIKTHDDLKTRGL[CVKELNVPDNYV<br>EKFKKWFQDDETTR[CYIK[CVLNKMELFDTANGFNVENLVEQ<br>LGQNKDKTEVRTEVTK[CSDKNEQKSDD[CTWAYRGFK[CFLSKH<br>LQLVQSSVKS               | Closed | Closed | 0.9936         | 6 cysteines in the mature part of the protein.<br>The cysteine pattern is conserved.<br>Classic OBP. |
| >11107<br>MKLFLVFWTIFALVSAEWVPRTSDQMYKDQAE[CFKQLELTEEE<br>QQKVKKEDFPDEPKFR[CYLR[CILMGGQIWDDEKGYNPERAYA<br>ELLNIDMTADVENLRK[CNQNLHHSDS[CTRAFRVVK[CFANN<br>YITSIKPKS             | Closed | Closed | 0.999          | 6 cysteines in the mature part of the protein.<br>The cysteine pattern is conserved.<br>Classic OBP. |
| >31956<br>MSFPKINSVVI[VILSALVLVVVRKVDENKLKAYTANIAKT[C<br>QPEGEPFGEVHDIVEKANPTQDEK[CFIT[CTMTKWGLLSENGKF<br>QPDGVRKVNEAIREFDDNPAEYKNADEAIIAK[CSAIEKPEK[CDK<br>GYAIAE[CGFKVFDEIHG | Closed | Closed | 0.8483         | 6 cysteines in the mature part of the protein.<br>The cysteine pattern is conserved.<br>Classic OBP. |

|                                                                                                                                                                                                                                                                                                      |        |        |        |                                                                                                            |
|------------------------------------------------------------------------------------------------------------------------------------------------------------------------------------------------------------------------------------------------------------------------------------------------------|--------|--------|--------|------------------------------------------------------------------------------------------------------------|
| >4812<br>MTKILIIATVFCAALTAAYDFKDTAFNEVILKDLLDLTDGSDSS<br>VLHRIARAAEGAADGEECKGRKKDRGVHCCTDKIDPKQLESIK<br>AAKKECLAELHGNDSDVYFKFDPFTCEKLEELKKDVTVAEC<br>VGKKFGVLDEAGNVKHDVFLAHLKTKVQDSEWKLKVSDSIAE<br>KCIETKKEVEGHIKRDVTSQKACNPTSLKISQCLWREYVRA<br>CPKDLQVDSPKCNKLREKIEKGDAVSYKGFYLRHLNDDK              | Closed | Closed | 0.9918 | 12 cysteines in the mature part of the protein.<br>The cysteine pattern is not conserved.<br>Atypical OBP. |
| >7755<br>MAKILIVVAIASLCAAISTAYDFKDSAFNEVIFRDLLDLTDDDD<br>NSVLHREVRTADTAIRVDPVPGTECKEKRRDRGFYCCNDKV<br>DLNQLEIIRGVRKECLAELHGNDSDIYFKFDPFTCEKLEELKKD<br>VTCAECVGKKFGLLDDSGNIKPDIFLAYLKMKAKDSEWKLQV<br>TDEIAGKCIEDTRKEVEHHLAERDLTSGKICNPSSLKISQCLWRE<br>YVRACPKNLQTDSPKCKKLREKIEKGDAVTYKGFYLRHLNDD<br>K | Open   | Open   | 0.9898 | 14 cysteines in the mature part of the protein.<br>The cysteine pattern is not conserved.<br>Atypical OBP. |
| >31807<br>MFRNLSVFLVCAFAVQCLADPDCSQRPKKEDFMNCCAKPAPF<br>KDVMACNDKFPFQKGEPNFCHECVFNETGISVNGVIQKDKI<br>SAILGEMYKAMPDFIPVATKAVEKCDETVRTKMAKIMEHKPEG<br>ADKCNPVPAVYGFCIFVETMVNCPASGWQNTDDCNRAREFMK<br>SCPMHHKQ                                                                                           | Closed | Closed | 0.9996 | 12 cysteines in the mature part of the protein.<br>The cysteine pattern is not conserved.<br>Atypical OBP. |
| >42512<br>MFRDLSVFLVCVFVVQCLADPDCEPPKKKDFMGCKKPEALS<br>EIITKCKSEKYPFEHRRPNICYGECVFNETGLAVDGVIRDKISSVI<br>GEFYKDMPDLIPVATEAIEKCGEIIRAKMEK                                                                                                                                                             | Open   | Open   | 0.9992 | 7 cysteines in the mature part of the protein.<br>Being incomplete at 3' it cannot be classified.          |
| >51370<br>MHPLELSVFIFGVFVSTTFAAEPNCAQPPPPANIQQCCNNQVFA<br>ELAPKCVSKIPATAGMPRPIGMCFGECMFNETGLSVNGQIQLD<br>KAKSILTEKFKAIFEVAPFEQALTKCDKIIKEKMASGKPPANM<br>PPIPENAMADIIASCTMLEAFINCPDSKWQNNEACNNAKQYFKS<br>CPMPPPPKA                                                                                    | Closed | Closed | 0.9977 | 12 cysteines in the mature part of the protein.<br>The cysteine pattern is not conserved.<br>Atypical OBP. |



|                                                                                                                                                                                                      |        |        |        |                                                                                                            |
|------------------------------------------------------------------------------------------------------------------------------------------------------------------------------------------------------|--------|--------|--------|------------------------------------------------------------------------------------------------------------|
| >45961<br>MPLPTTYFRGCLFLFLVAVFAEDHCSKPPPKFAPRECCCEPVKWS<br>ESNVEDKCAGAPSAVCFTECIFNSTDIIQNDGPNATNIRTFEIEL<br>KADPDYIPIAINNFEMCYSLVKRRMEDKDHQIDGDTFPALIME<br>CTIAQMFVDCPSEKWKSSSEACELARKYYKRPCDRHFTTNA | Open   | Closed | 0.9971 | 12 cysteines in the mature part of the protein.<br>The cysteine pattern is not conserved.<br>Atypical OBP. |
| >441<br>MKFLIVLCAVLALVQADWGTKAPEDLIKDRLECFESEKVSHH<br>QEIQKKGEFPHEPGCYRCLGLKSGIWDDTNGFNIERGIASFEAT<br>GWVVEKDNLLKCTTDDQKNDDPCKWSAAIAKCLFDNKYLKR<br>KA                                                | Open   | Closed | 0.9997 | 7 cysteines in the mature part of the protein.<br>The cysteine pattern is conserved.<br>Plus OBP.          |
| >758<br>MKLLIVLCAVIAMACAVSKEEFLKIREEGLKSENVQAVIEKLK<br>NREYGGDLGHEAKCYIRCLGLKTGNWDDTNGYDVKVFADF<br>NGAGLEVTKENLLKCFKSSGDDDDKVWAAKDLKCLWTNKYI<br>SRKQ                                                 | Closed | Closed | 0.9979 | 5 cysteines in the mature part of the protein.<br>The cysteine pattern is conserved.<br>Minus OBP.         |
| >768<br>MKFFVASCVLLAVASAQWAPKTGKEVAQIREDCVKEENVPE<br>LAEGLKKFEYPDEEPIRCYVKCVSAKLGWVNDDETGFADRV<br>DQVKQDRNKDDIKAEVEKCIDKNEQNSDKCTWAXXNLKVM<br>DKKLLQVESLIAN                                          | Closed | Closed | 0.9986 | 6 cysteines in the mature part of the protein.<br>The cysteine pattern is conserved.<br>Classic OBP.       |
| >1173<br>MKSLIIFCAIFAVVFANWSTPTKEQFKQHRDDCLKEGNVPEETA<br>NKIRKEQYPNDRDTYCYIRCVGSKSGIWNDRKGYDIDRSLQVF<br>EANGYEVTRENLERCFAPLPGADCTWAGVNMRLRDNKYVT<br>KKASA                                            | Closed | Closed | 0.9973 | 6 cysteines in the mature part of the protein.<br>The cysteine pattern is conserved.<br>Classic OBP.       |
| >1844<br>MKILISLFAIFVLVTADWEPRNREQFIKDRDECFKSENLSEHCID<br>EIKRRIFPHEPKCYFRCLVMKNSVWDDTSGYDVEKAHKELTHN<br>GLEIAKEDLNKCNSEEMKNKDPVWANNIICWIDYLPKKKQE                                                   | Closed | Closed | 0.9957 | 7 cysteines in the mature part of the protein.<br>The cysteine pattern is conserved.<br>Plus OBP.          |
| >2633<br>MKFFIVLCAIIAMAFISTEEFQEMREECFKSEKVPEADIEKLKH<br>REYGLDLGHEAKCYIRCLGMKTGNWDDTNGYDVEKIYTDFT                                                                                                   | Closed | Closed | 0.9988 | 6 cysteines in the mature part of the protein.<br>The cysteine pattern is conserved.                       |



|                                                                                                                                                            |        |        |               |                                                                                                          |
|------------------------------------------------------------------------------------------------------------------------------------------------------------|--------|--------|---------------|----------------------------------------------------------------------------------------------------------|
| AGLEVTKENLKKCFKSSGDDDKCVWAAKDLKCLWTKYMSR<br>KQ                                                                                                             |        |        |               | Classic OBP.                                                                                             |
| >3948<br>MKFFIVLCVVIAMAAAQWTPKSKEELLKFREECFKSENVQAV<br>IEKLNNRQYDEDLGQEARCYIRCLGLKSEIWDDTNGYDLERSY<br>QNLSTGFEVSKENLQKCITPNTDNDKCTWAAKNLKLWTKN<br>KYVTKKQ  | Open   | Closed | 0.9987        | 6 cysteines in the mature part of the protein.<br>The cysteine pattern is conserved.<br>Classic OBP.     |
| >3962<br>MKFIIVFCAVIAMAAALWPTTKEEFLKQREECFKSENVQAVI<br>EKLNNRQYDEDLGPEAKCYIRCLGLKSGTWDDTNGYDLEKSY<br>ENLLSSGFEVTKENLKKCITSNPDNDKCTWAAKDLKCLWTH<br>KYITKKQ  | Open   | Closed | 0.9902        | 6 cysteines in the mature part of the protein.<br>The cysteine pattern is conserved.<br>Classic OBP.     |
| >3982<br>MKCSLICFLLVFAIASGSDWEPKGNEELVSIRDECFKLENVSEES<br>AAKILKNEYDPESVHCYVRCYTSKVGTDWDEAGPDIDRTLRLQ<br>IQKSGNTITREELVRCPEKQENKCLWAYKGLMCILKSEGKDD<br>LIK | Open   | Closed | 0.9987        | 6 cysteines in the mature part of the protein.<br>The cysteine pattern is conserved.<br>Classic OBP.     |
| >4168<br>MKILISLFAIFVLVTADWKPRNKEQLIKDRDECFKSENLEHCHID<br>EVKRRIFPDEPKCHFRCLFMKNSVWDDTSGYDVEKAYKELTH<br>NGFELSKEDLNKCNSEEMKNKDSVWAGNAVKCTWDYLPKK<br>KQD    | Closed | Closed | 0.9925        | 6 cysteines in the mature part of the protein.<br>The cysteine pattern is conserved.<br>Classic OBP.     |
| >5161<br>MKILISLFAIFVLVTADWKPRNREQLIKDRDECFKSENLEHCHID<br>EIKRRIFPDEPKCHFRCLFMKNTVWDDTSGYDVEKAYKELTHN<br>GFELSKEDLNKCNSEVMKNKDPCVWAGNAVKCTWDYLPKKK<br>QD   | Closed | Closed | 0.9918        | 6 cysteines in the mature part of the protein.<br>The cysteine pattern is conserved.<br>Classic OBP.     |
| >5826<br>LKIRREELKSEKVPEAVIEKLKNREYGQDLGHEAKCYIRCLGLK<br>TGIWDDTHGYNVDKAYDDFHSAGLEVSKDNLKKCFISTGDDD<br>KCVWAAKDLKCLWTKYATKKE                               | Open   | Closed | Not evaluable | 6 cysteines in the mature part of the protein.<br>Being incomplete at 5' and 3' it cannot be classified. |
| >7404<br>MKYIIVLCVVIAMAAALWPTTKKEFLKQREECFKSENVQAV<br>IEKLNNRQYDEDLGPEAKCYIRCLGLKSGTWDDTNGYDLEKSY                                                          | Open   | Closed | 0.9822        | 6 cysteines in the mature part of the protein.<br>The cysteine pattern is conserved.                     |

|                                                                                                                                                                                 |        |        |               |                                                                                                                     |
|---------------------------------------------------------------------------------------------------------------------------------------------------------------------------------|--------|--------|---------------|---------------------------------------------------------------------------------------------------------------------|
| ENLLSSGFVTKENLKK[C]ITSNPDNDDK[C]TWAAKDLK[C]LWTH<br>KFITKKQ                                                                                                                      |        |        |               | Classic OBP.                                                                                                        |
| >7621<br>MKLLIGLCAMIAMVASQWSPSTKIDYLKFRDE[C]FKSENVPSAI<br>DKLNNEQYGEDLGHEAK[C]YIR[C]LGVKGTWDDTKGYDIEKGY<br>QNLISWGFEVNKENLQK[C]ATPNTENDDK[C]VWAAKNTK[C]LWT<br>NKYVTKKQ          | Open   | Closed | 0.9978        | 6 cysteines in the mature part of the protein.<br>The cysteine pattern is conserved.<br>Classic OBP.                |
| >9011<br>MKLFFVLAAIVAFASAEWATRSPAELAQSRLS[C]IQELSPANLV<br>EQIKKFQYPDEEIVR[C]YIR[C]TSEKIGIWSDDSGFITDRVIEQLAGN<br>RDKDAFRADVLC[C]IDSNEQKSDK[C]TWAYRNFNC[C]FIKNNLILVQ<br>SQINASS   | Open   | Closed | 0.9986        | 6 cysteines in the mature part of the protein.<br>The cysteine pattern is conserved.<br>Classic OBP.                |
| >13738<br>MKLLIFLFAIFVLVAADWKPRSREQYTKDGDE[C]FKSENISEDGI<br>HEIRRHVFTDDSK[C]FFR[C]VLMKNHVWDDTTGYNVERVYKEVT<br>HIGLKASKDGLTQ[C]NSDDKKDKDP[C]QWVNNIVR[C]VFEHNYIEP<br>NY           | Closed | Closed | 0.9972        | 6 cysteines in the mature part of the protein.<br>The cysteine pattern is conserved.<br>Classic OBP.                |
| >14606<br>MQLFIILFAMVAMASAIPEKYLKYREERFKSEKVPVAVIEKLN<br>NPQYEEDMGHEAK[C]FIR[C]MALKIGSWDDTNGYNIDKTYADFQ<br>DGGLEVSKENMKK[C]FTSNPDNDDK[C]VWADKDLK[C]LYRNKYV<br>THKYSIN           | Closed | Closed | 0.9968        | 5 cysteines in the mature part of the protein.<br>Minus OBP.                                                        |
| >15984<br>QNEASGGV[C]AVLILVHAHWKPKTLEE-<br>TQAC[C]TE[C]SESEKVSNC[C]QEEIMSDEYPHPG[C]YFR[C]IRLKTGT-<br>DDTNGYNIDSDYETLMSTVWEVRKDNVKE[C]DSADKKDDDP[C]<br>RWSAAVAK[C]LFDNRYRRRSKRIG | Open   | Closed | Not evaluable | 9 cysteines in the mature part of the protein.<br>Due to the inserted premature stop codon it cannot be classified. |
| >29339<br>MKFLIVLCAVIAMACAITKEQVLMYREE[C]FESEKVPEAVIEKLN<br>NREYGEDLGHEAK[C]YIR[C]LGLKTGTWDGTHGYDIEKTYEHMT<br>EAGLVGTKENLKK[C]FKAS                                              | Open   | Open   | 0.997         | 4 cysteines in the mature part of the protein.<br>Being incomplete at 3' it cannot be classified.                   |

|                                                                                                                                                                                                                                        |        |        |               |                                                                                                          |
|----------------------------------------------------------------------------------------------------------------------------------------------------------------------------------------------------------------------------------------|--------|--------|---------------|----------------------------------------------------------------------------------------------------------|
| >171<br>MKYFLLFLTLLPVALATWVPHTKEDFLKYRLD <b>C</b> YKESNITEAN<br>FEKIKKHQFAHDHDTY <b>C</b> YIH <b>C</b> LGLKLGWDELKGYDVDRVYET<br>LKVHNLDVKKEDLSK <b>C</b> FHQVIDADT <b>C</b> TWSAINWM <b>C</b> LWERKYI<br>TKKN                          | Closed | Closed | 0.9985        | 6 cysteines in the mature part of the protein.<br>The cysteine pattern is conserved.<br>Classic OBP.     |
| >363<br>MKYFLLFLTLLPVAFATWVPHTKEDFLKYRLD <b>C</b> YKESNITEAN<br>FEKIKKQQFAHDHDTY <b>C</b> YIH <b>C</b> LGLKLGWDELKGYDVDRVYET<br>LKVHNLDVKKEDLSK <b>C</b> FHQVMDADT <b>C</b> TWSAINWM <b>C</b> LWERKY<br>ITKKN                          | Open   | Closed | 0.9984        | 6 cysteines in the mature part of the protein.<br>The cysteine pattern is conserved.<br>Classic OBP.     |
| >1936<br>MKSLIVFCAILGLVYADWKPKTREEWSRHRVE <b>C</b> FESEKVSHHC<br>QEQVKKGEYAHESG <b>C</b> YYR <b>C</b> IGLKVGFWDDTNGFNNDRGDEAF<br>TATGWEVEKENLKK <b>C</b> ASADQKDDDP <b>C</b> KWSLIVAK <b>C</b> LIENKYL<br>KLKA                         | Open   | Closed | 0.999         | 6 cysteines in the mature part of the protein.<br>The cysteine pattern is conserved.<br>Classic OBP.     |
| >13737<br>MKLLIFLFAIFVFVAAHWEPRSKEQHDKDGEA <b>C</b> FKSEVIHGDMI<br>DYETK <b>C</b> FLR <b>C</b> VLMKNNVWNDTTGYNVERAYNEATHIGLRASK<br>EGLTE <b>C</b> NSDDKKDKDP <b>C</b> LWVNNILR <b>C</b> AYEHNYMKPNF                                    | Open   | Closed | 0.9982        | 6 cysteines in the mature part of the protein.<br>The cysteine pattern is conserved.<br>Classic OBP.     |
| >3485<br>TAAYDFKDSAFNEVILKDLLDLTDGSDSSVLHRIARAAEGAAE<br>GEE <b>C</b> KGRKKDRGVH <b>CC</b> SDKIDPKQLESIAAKKE <b>C</b> LAELHGND<br>SDVYFKFDPFT <b>C</b> EKLEELKKDVT <b>C</b> VAE <b>C</b> V                                              | Open   | Open   | Not evaluable | 7 cysteines in the mature part of the protein.<br>Being incomplete at 5' and 3' it cannot be classified. |
| >59460<br>MAKLGVTISILLVIFVCVSAGLDEDPIISIVTEVPDDSELRVIAKK <b>C</b><br>KIPGVSDEEIERMLNDDTNLSYGGK <b>C</b> TLK <b>C</b> IAENIGIVIKDDQID<br>VAATKKIVEKSAVDKEELAMPFYLIDK <b>C</b> GEIKDKDE <b>C</b> ELAYKL<br>NL <b>C</b> MIEATKEWNSNSTSDDL | Open   | Closed | 0.9948        | 6 cysteines in the mature part of the protein.<br>The cysteine pattern is conserved.<br>Classic OBP.     |

**Table S5. Analysis of the OBP sequences from larval transcriptome, searching for complete sequence at 5' and 3' ends, the presence of the signal peptide with SignalP-5.0 software (<http://www.cbs.dtu.dk/services/SignalP/>) and the conserved cysteine pattern.** In some cases, although the Expasy-Translate Tool software highlights the longest frame beginning with a methionine, comparing the sequence with similar proteins in known databases (NCBI protein database), it was possible to indicate the correct frame. In some cases. the frame is not complete at 3' or at 5' ends and comparing it with similar *H. illucens* proteins or with

similar sequences in known protein databases (NCBI protein database), it is possible to confirm that the sequence from the transcriptome is or is not complete and if it includes or not includes the entire mature peptide.

| <b>Contig larve<br/>vs contig adulti</b> | <b>Query cover</b> | <b>E value</b> | <b>Identity</b> | <b>FPKMF<br/>female</b> | <b>FPKMF female<br/>antennae</b> | <b>FPKMF<br/>male</b> | <b>FPKMF<br/>male<br/>antennae</b> | <b>FPKMF<br/>larve</b> |
|------------------------------------------|--------------------|----------------|-----------------|-------------------------|----------------------------------|-----------------------|------------------------------------|------------------------|
| L21691<br>A41232                         | 100%               | 7e-104         | 99.29%          | -10,7649                | 3,69384                          | -10,7649              | 5,35387                            | 0,0401                 |
| L21691<br>A30834                         | 100%               | 2e-79          | 75.18%          | -10,7649                | 2,61425                          | -4,24521              | 3,09515                            | 0,0401                 |
| L13368<br>A30834                         | 100%               | 1e-104         | 100.00%         | -10,7649                | 2,61425                          | -4,24521              | 3,09515                            | 0,89892                |
| L13368<br>A41232                         | 100%               | 3e-79          | 75.18%          | -10,7649                | 3,69384                          | -10,7649              | 5,35387                            | 0,89892                |
| L57<br>A2226                             | 100%               | 4e-103         | 100.00%         | 4,11987                 | 10,57058                         | 5,53602               | 12,01216                           | 11,85349               |
| L11107<br>A11394                         | 100%               | 2e-105         | 100.00%         | 9,55913                 | -1,7328                          | 2,20579               | -0,46969                           | -0,34034               |
| L31956<br>A2668                          | 100%               | 2e-72          | 64.19%          | 6,6053                  | 13,19403                         | 7,24019               | 13,70307                           | 0,31151                |
| L45961<br>A43028                         | 100%               | 8e-134         | 100.00%         | -0,19222                | 2,52798                          | -4,85699              | -2,47856                           | -0,92375               |
| L441<br>A7966                            | 99%                | 7e-74          | 73.85%          | 3,47829                 | 0,15025                          | 1,58682               | 0,00442                            | 9,37253                |
| L441<br>A12769                           | 100%               | 2e-69          | 67.94%          | 3,86579                 | 0,56347                          | 2,73711               | 0,17682                            | 9,37253                |
| L441<br>A1903                            | 99%                | 3e-50          | 54.62%          | 4,65469                 | 7,27189                          | 5,03439               | 8,84078                            | 9,37253                |
| L758<br>A1003                            | 100%               | 6e-81          | 82.31%          | 6,68164                 | 2,84356                          | 5,75724               | 3,43187                            | 11,03303               |
| L758<br>A1002                            | 100%               | 1e-81          | 83.08%          | 0,93363                 | -1,38168                         | 4,46701               | 2,46501                            | 11,03303               |
| L758<br>A32259                           | 100%               | 4e-72          | 74.81           | -0,96758                | 0,82233                          | -2,64139              | 2,88503                            | 11,03303               |
| L758<br>A23172                           | 100%               | 4e-63          | 65.19%          | 0,28088                 | 3,84337                          | -0,28919              | 3,35445                            | 11,03303               |

|                 |      |        |         |          |          |          |          |          |
|-----------------|------|--------|---------|----------|----------|----------|----------|----------|
| L758<br>A5932   | 99%  | 1e-62  | 63.85%  | 6,30632  | 2,36596  | 5,80518  | 3,93491  | 11,03303 |
| L768<br>A11523  | 100% | 4e-100 | 98.55%  | 2,32154  | 2,35944  | -0,07859 | 6,06551  | 7,61154  |
| A768<br>A8085   | 98%  | 9e-53  | 50.00%  | 5,55537  | 8,18802  | 3,79547  | 9,13051  | 7,61154  |
| L1173<br>A8987  | 100% | 3e-103 | 99.25%  | -0,27302 | -10,7649 | -2,13043 | -4,14432 | 9,13816  |
| L1844<br>A420   | 100% | 7e-97  | 97.71%  | -2,30704 | 3,12847  | 7,92604  | 3,81125  | 5,58966  |
| L1844<br>A410   | 100% | 7e-97  | 100.00% | 7,11937  | 3,25015  | 7,79462  | 5,78825  | 5,58966  |
| L2633<br>A1002  | 100% | 2e-94  | 96.15%  | 0,93363  | -1,38168 | 4,46701  | 2,46501  | 8,23609  |
| L2633<br>A1003  | 100% | 6e-98  | 99.23%  | 6,68164  | 2,84356  | 5,75724  | 3,43187  | 8,23609  |
| L2633<br>A32259 | 100% | 3e-71  | 73.28%  | -0,96758 | 0,82233  | -2,64139 | 2,88503  | 8,23609  |
| L2633<br>A23172 | 100% | 2e-61  | 62.96%  | 0,28088  | 3,84337  | -0,28919 | 3,35445  | 8,23609  |
| L2633<br>A5932  | 99%  | 3e-60  | 62.31%  | 6,30632  | 2,36596  | 5,80518  | 3,93491  | 8,23609  |
| L3948<br>A23172 | 100% | 8e-102 | 99.26%  | 0,28088  | 3,84337  | -0,28919 | 3,35445  | 9,34447  |
| L3948<br>A32259 | 100% | 3e-63  | 61.48%  | -0,96758 | 0,82233  | -2,64139 | 2,88503  | 9,34447  |
| L3948<br>A1002  | 100% | 2e-62  | 63.70%  | 0,93363  | -1,38168 | 4,46701  | 2,46501  | 9,34447  |
| L3948<br>A1003  | 100% | 4e-61  | 62.22%  | 6,68164  | 2,84356  | 5,75724  | 3,43187  | 9,34447  |
| L3948<br>A5932  | 99%  | 2e-59  | 59.70%  | 6,30632  | 2,36596  | 5,80518  | 3,93491  | 9,34447  |
| L3962<br>A23172 | 100% | 2e-86  | 82.96%  | 0,28088  | 3,84337  | -0,28919 | 3,35445  | 7,72721  |
| L3962<br>A1003  | 100% | 2e-65  | 68.15%  | 6,68164  | 2,84356  | 5,75724  | 3,43187  | 7,72721  |
| L3962           | 100% | 2e-66  | 68.89%  | 0,93363  | -1,38168 | 4,46701  | 2,46501  | 7,72721  |

|                 |      |        |         |          |          |          |         |         |
|-----------------|------|--------|---------|----------|----------|----------|---------|---------|
| A1002           |      |        |         |          |          |          |         |         |
| L3962<br>A32259 | 100% | 2e-64  | 63.70%  | -0,96758 | 0,82233  | -2,64139 | 2,88503 | 7,72721 |
| L3962<br>A5932  | 99%  | 6e-63  | 61.94%  | 6,30632  | 2,36596  | 5,80518  | 3,93491 | 7,72721 |
| L3982<br>A2731  | 100% | 3e-101 | 99.26%  | 5,60252  | 3,68816  | 4,80744  | 4,02918 | 6,59036 |
| L4168<br>A420   | 100% | 1e-88  | 87.79%  | -2,30704 | 3,12847  | 7,92604  | 3,81125 | 4,44637 |
| L4168<br>A410   | 100% | 1e-88  | 87.79%  | 7,11937  | 3,25015  | 7,79462  | 5,78825 | 4,44637 |
| L5161<br>A420   | 100% | 5e-89  | 88.55%  | -2,30704 | 3,12847  | 7,92604  | 3,81125 | 4,62042 |
| L5161<br>A410   | 100% | 5e-89  | 88.55%  | 7,11937  | 3,25015  | 7,79462  | 5,78825 | 4,62042 |
| L7404<br>A23172 | 100% | 3e-85  | 81.48%  | 0,28088  | 3,84337  | -0,28919 | 3,35445 | 5,17879 |
| L7404<br>A1003  | 100% | 2e-64  | 66.67%  | 6,68164  | 2,84356  | 5,75724  | 3,43187 | 5,17879 |
| L7404<br>A1002  | 100% | 2e-65  | 67.41%  | 0,93363  | -1,38168 | 4,46701  | 2,46501 | 5,17879 |
| L7404<br>A32259 | 100% | 2e-63  | 62.96%  | -0,96758 | 0,82233  | -2,64139 | 2,88503 | 5,17879 |
| L7404<br>A5932  | 99%  | 3e-62  | 61.19%  | 6,30632  | 2,36596  | 5,80518  | 3,93491 | 5,17879 |
| L7621<br>A23172 | 100% | 8e-79  | 74.07%  | 0,28088  | 3,84337  | -0,28919 | 3,35445 | 0,3045  |
| L7621<br>A1002  | 100% | 8e-58  | 60.00%  | 0,93363  | -1,38168 | 4,46701  | 2,46501 | 0,3045  |
| L7621<br>A1003  | 100% | 5e-57  | 59.26%  | 6,68164  | 2,84356  | 5,75724  | 3,43187 | 0,3045  |
| L7621<br>A32259 | 100% | 3e-57  | 57.78%  | -0,96758 | 0,82233  | -2,64139 | 2,88503 | 0,3045  |
| L7621<br>A5932  | 99%  | 2e-55  | 58.21%  | 6,30632  | 2,36596  | 5,80518  | 3,93491 | 0,3045  |
| L9011<br>A8085  | 100% | 7e-105 | 100.00% | 5,55537  | 8,18802  | 3,79547  | 9,13051 | 5,04794 |

|                  |      |        |         |          |          |          |          |         |
|------------------|------|--------|---------|----------|----------|----------|----------|---------|
| L9011<br>A11523  | 97%  | 5e-55  | 51.47%  | 2,32154  | 2,35944  | -0,07859 | 6,06551  | 5,04794 |
| L13738<br>A3768  | 100% | 9e-101 | 100.00% | 7,33693  | 5,82076  | 6,06532  | 5,78634  | 0,1514  |
| L14606<br>A5932  | 100% | 1e-98  | 96.27%  | 6,30632  | 2,36596  | 5,80518  | 3,93491  | 3,0838  |
| L14606<br>A1003  | 99%  | 2e-59  | 60.77%  | 6,68164  | 2,84356  | 5,75724  | 3,43187  | 3,0838  |
| L14606<br>A32259 | 97%  | 4e-64  | 67.94%  | -0,96758 | 0,82233  | -2,64139 | 2,88503  | 3,0838  |
| L14606<br>A1002  | 97%  | 5e-61  | 62.31%  | 0,93363  | -1,38168 | 4,46701  | 2,46501  | 3,0838  |
| L14606<br>A23172 | 97%  | 6e-59  | 59.70%  | 0,28088  | 3,84337  | -0,28919 | 3,35445  | 3,0838  |
| L1936<br>A7966   | 100% | 6e-69  | 64.89%  | 3,47829  | 0,15025  | 1,58682  | 0,00442  | 5,2587  |
| L1936<br>A12769  | 99%  | 3e-72  | 70.00%  | 3,86579  | 0,56347  | 2,73711  | 0,17682  | 5,2587  |
| L1936<br>A1903   | 99%  | 2e-46  | 53.08%  | 4,65469  | 7,27189  | 5,03439  | 8,84078  | 5,2587  |
| L13737<br>A3768  | 100% | 3e-68  | 69.47%  | 7,33693  | 5,82076  | 6,06532  | 5,78634  | 0,66434 |
| L59460<br>A17957 | 100% | 2e-108 | 95.45%  | -2,81417 | -2,34619 | -1,02855 | -1,27948 | 0,34166 |

**Table S6: Complete OBP sequences from larvae and adult transcriptome were compared using the Basic Local Alignment Search Tool Protein (BLASTp).** Query cover, E-value, Similarity and FPKMF of female body, female antennae, male body and male antennae are reported. Alignment with identity between 97% and 100% and identity greater than 50% are reported.

|        |                                    |     |     |        |                                                             |     |
|--------|------------------------------------|-----|-----|--------|-------------------------------------------------------------|-----|
| L11107 | MKLFIVFWTIFALVSAEWVPRTS            | 60  | 60  | L45961 | MPLPFTTYFRGCLFLFLVAVFAEDHCSKPPPKFAPRECCEPVKWS               | 60  |
| A11394 | MKLFIVFWTIFALVSAEWVPRTS            | 60  | 60  | A43028 | MPLPFTTYFRGCLFLFLVAVFAEDHCSKPPPKFAPRECCEPVKWS               | 60  |
| L11107 | YLRCLIMGGQIWDDEKGYNPERAYAE         | 120 | 120 | L45961 | FTFECIFNSTDIIQNDGPNATNIRTFEIELKADPDYIPIAINNFEMCYSLVKRRMEDKD | 120 |
| A11394 | YLRCLIMGGQIWDDEKGYNPERAYAE         | 120 | 120 | A43028 | FTFECIFNSTDIIQNDGPNATNIRTFEIELKADPDYIPIAINNFEMCYSLVKRRMEDKD | 120 |
| L11107 | KCFANNNYITSIKPKS                   | 136 | 136 | L45961 | QIDGCDTFPALIMECTIAQMFVDCPSEKNKSSEACELARKYKRC                | 174 |
| A11394 | KCFANNNYITSIKPKS                   | 136 | 136 | A43028 | QIDGCDTFPALIMECTIAQMFVDCPSEKNKSSEACELARKYKRC                | 174 |
| L21691 | MNCFASVVFVIAALVAVSQANVNDPKLKS      | 60  | 60  | L2633  | MKFFIVLCAIIMAFISTEEFQEMREECFKSEKVP                          | 60  |
| A41232 | MNCFASVVFVIAALVAVSQANVNDPKLKS      | 60  | 60  | A1003  | MKFFIVLCAIIMAFISTEEFQEMREECFKSEKVP                          | 60  |
| L21691 | CVISCMVKNYKLLSDDGKVNDRVFM          | 120 | 120 | L2633  | RCLGMKTGNWDDTNGYDVEKIYTD                                    | 120 |
| A41232 | CVISCMVKNYKLLSDDGKVNDRVFM          | 120 | 120 | A1003  | RCLGMKTGNWDDTNGYDVEKIYTD                                    | 120 |
| L21691 | AFNFGCHCKMTEMTARNIPMD              | 141 | 141 | L2633  | WTNKYMSRKQ                                                  | 130 |
| A41232 | AFNFGCHCKMTEMTARNIPMD              | 141 | 141 | A1003  | WTNKYMSRKQ                                                  | 130 |
| L1844  | MKILISLFAIFVLVTADWEPRNRQFI         | 60  | 60  | L1173  | MKSLIIFCAIFAVVFNWSTPTKEQFK                                  | 60  |
| A410   | MKILISLFAIFVLVTADWEPRNRQFI         | 60  | 60  | A8987  | MKSLIIFCAIFAVVFNWSTPTKEQFK                                  | 60  |
| L1844  | RCVLMKNSVWDDTSGYDVEKAKHKL          | 120 | 120 | L1173  | YIRCVGSKSGIWNDRKGYDIDRSLQV                                  | 120 |
| A410   | RCVLMKNSVWDDTSGYDVEKAKHKL          | 120 | 120 | A8987  | YIRCVGSKSGIWNDRKGYDIDRSLQV                                  | 120 |
| L1844  | INDVLPKKQK                         | 131 | 131 | L57    | MKVVLVLLAVIGVAAATYTIKTHDDL                                  | 60  |
| A410   | INDVLPKKQK                         | 131 | 131 | A2226  | MKVVLVLLAVIGVAAATYTIKTHDDL                                  | 60  |
| L2633  | MKFFIVLCAIIMAFISTEEFQEMREECFKSEKVP | 60  | 60  | L57    | IKCVLNMKMLFDTANGFNVENLVEQL                                  | 120 |
| A1002  | MKFFIVLCAIIMAFISTEEFQEMREECFKSEKVP | 60  | 60  | A2226  | IKCVLNMKMLFDTANGFNVENLVEQL                                  | 120 |
| L2633  | RCLGMKTGNWDDTNGYDVEKIYTD           | 120 | 120 | L3982  | MKCSLICFLLVFAIASGSDWEPKGNELVS                               | 60  |
| A1002  | RCLGMKTGNWDDTNGYDVEKIYTD           | 120 | 120 | A2731  | MKCSLICFLLVFAIASGSDWEPKGNELVS                               | 60  |
| L2633  | WTNKYMSRKQ                         | 130 | 130 | L3982  | HCYVRCTSAKVGTDWDEAGPDIDRTL                                  | 120 |
| A1002  | WTNKYMSRKQ                         | 130 | 130 | A2731  | HCYVRCTSAKVGTDWDEAGPDIDRTL                                  | 120 |
| L2633  | MKFFIVLCAIIMAFISTEEFQEMREECFKSEKVP | 60  | 60  | L3982  | MCILKSEGIKDDLIK                                             | 135 |
| A1003  | MKFFIVLCAIIMAFISTEEFQEMREECFKSEKVP | 60  | 60  | A2731  | MCILKSEGIKDDLIK                                             | 135 |
| L2633  | RCLGMKTGNWDDTNGYDVEKIYTD           | 120 | 120 | L9011  | MKLFVLLAAIVAFASAEWATRS                                      | 60  |
| A1003  | RCLGMKTGNWDDTNGYDVEKIYTD           | 120 | 120 | A8085  | MKLFVLLAAIVAFASAEWATRS                                      | 60  |
| L2633  | WTNKYMSRKQ                         | 130 | 130 | L9011  | YIRCTSEKIGIWSDDSGFITDRVIEQL                                 | 120 |
| A1003  | WTNKYMSRKQ                         | 130 | 130 | A8085  | YIRCTSEKIGIWSDDSGFITDRVIEQL                                 | 120 |
| L3948  | MKFFIVLCVVIAMAAQWTPKSKEELL         | 60  | 60  | L9011  | FNCFIRNNLILVSGQINASS                                        | 140 |
| A23172 | MKFFIVLCVVIAMAAQWTPKSKEELL         | 60  | 60  | A8085  | FNCFIRNNLILVSGQINASS                                        | 140 |
| L3948  | RCYIRCIIGLKEIWDGTNGYDLERSYQ        | 120 | 120 | L13738 | MKLLIFLFAIFVLVAADWKP                                        | 60  |
| A23172 | RCYIRCIIGLKEIWDGTNGYDLERSYQ        | 120 | 120 | A3768  | MKLLIFLFAIFVLVAADWKP                                        | 60  |
| L3948  | NLKCLWNTKNYVTKKQ                   | 135 | 135 | L13738 | RCVLMKNNHVVDDTTGYNVERVYKEV                                  | 120 |
| A23172 | NLKCLWNTKNYVTKKQ                   | 135 | 135 | A3768  | RCVLMKNNHVVDDTTGYNVERVYKEV                                  | 120 |
| L13368 | MNRFASVVFVIAALAAALSQADVND          | 60  | 60  | L13738 | VFEHNYIEPNY                                                 | 131 |
| A30834 | MNRFASVVFVIAALAAALSQADVND          | 60  | 60  | A3768  | VFEHNYIEPNY                                                 | 131 |
| L13368 | CVMACVMKEFKLLGDDGKINRDVYMA         | 120 | 120 |        |                                                             |     |
| A30834 | CVMACVMKEFKLLGDDGKINRDVYMA         | 120 | 120 |        |                                                             |     |
| L13368 | ANNFQGCINKNEMIAARNIPMD             | 141 | 141 |        |                                                             |     |
| A30834 | ANNFQGCINKNEMIAARNIPMD             | 141 | 141 |        |                                                             |     |
| L768   | MKFFVASCVLVAVASQWAPKTGKEVAQ        | 60  | 60  |        |                                                             |     |
| A11523 | MKFFVASCVLVAVASQWAPKTGKEVAQ        | 60  | 60  |        |                                                             |     |
| L768   | YVKCVSAKLGVMNDETFGADRVAQVQ         | 120 | 120 |        |                                                             |     |
| A11523 | YVKCVSAKLGVMNDETFGADRVAQVQ         | 120 | 120 |        |                                                             |     |
| L768   | LKCVMDKKLLQVESLIAN                 | 138 | 138 |        |                                                             |     |
| A11523 | LKCVMDKKLLQVESLIAN                 | 138 | 138 |        |                                                             |     |

**Figure S3. Sequence alignments performed by Clustal Omega (<https://www.ebi.ac.uk/Tools/msa/clustalo>), between the sequences of common OBPs in larval and adult transcriptomes.**



| VOC                                                                                                                                                                                                                                                                                                                                                                                          | Source and/or process                                                                                                    | References         |
|----------------------------------------------------------------------------------------------------------------------------------------------------------------------------------------------------------------------------------------------------------------------------------------------------------------------------------------------------------------------------------------------|--------------------------------------------------------------------------------------------------------------------------|--------------------|
| <ul style="list-style-type: none"> <li>- acetic acid,1-methylethyl ester</li> <li>- 2-hexen-1-ol, (E)</li> <li>- acetophenone</li> <li>- propanoic acid, 1-methylethyl ester</li> </ul>                                                                                                                                                                                                      | <ul style="list-style-type: none"> <li>Thermal decomposition</li> <li>Fermentation and/or oxidative processes</li> </ul> | [203-205]          |
| <ul style="list-style-type: none"> <li>- 2-methyl-butanal</li> <li>- butanoic acid, propyl ester</li> </ul>                                                                                                                                                                                                                                                                                  | Milk and meat spoilage (lipid degradation)                                                                               | [206-209]          |
| <ul style="list-style-type: none"> <li>- 1-hexanol</li> <li>- 3-octanone,</li> <li>- 1-butanol, 3-methyl acetate,</li> <li>- delta limonene</li> <li>- 3-methyl butanal</li> </ul>                                                                                                                                                                                                           | Fish and meat spoilage (microbial contamination or unsuitable storage)                                                   | [28, 207, 210-212] |
| <ul style="list-style-type: none"> <li>- propanoic acid, ethyl ester</li> <li>- 2-hexanone</li> <li>- acetic acid, butyl ester</li> <li>-2-heptanone</li> <li>- styrene</li> <li>- hexanoic acid, ethyl ester</li> <li>- butanoic acid, 2-methyl, hexyl ester</li> <li>- acetic acid, 2-methylpropyl ester</li> <li>- alpha farnesene</li> <li>- 2-pentanone</li> <li>- 1-butanol</li> </ul> | Fungi and bacteria (food microbial contaminations)                                                                       | [26, 213-217]      |
| - butanoic acid, 1-methylethyl ester                                                                                                                                                                                                                                                                                                                                                         | Faecal contaminations                                                                                                    | [218]              |
| <ul style="list-style-type: none"> <li>- n-propyl acetate</li> <li>-3-methyl-1-butanol</li> </ul>                                                                                                                                                                                                                                                                                            | Vegetable spoilage                                                                                                       | [219]              |

**Table S7. Selected VOCs of interest, index of specific phases of organic degradation, in different food matrices.** VOC name and source and/or process generating these VOCs were reported.

## References:

105. Pontes, M.; Pereira, J.; Câmara, J.S. Dynamic headspace solid-phase microextraction combined with one-dimensional gas chromatography-mass spectrometry as a powerful tool to differentiate banana cultivars based on their volatile metabolite profile. *Food Chem.* **2012**, *134*, 2509–2520.
106. Satora, P.; Cioch, M.; Tarko, T.; Wołkowicz, J. Killer strains of *Saccharomyces*: Application for apple wine production. *J. Inst. Brew.* **2016**, *122*, 412–421.
107. Gao, P.; Martin, J. Volatile metabolites produced by three strains of *Stachybotrys chartarum* cultivated on rice and gypsum board. *J. Occup. Environ. Hyg.* **2002**, *17*, 430–436.
108. Espino-Díaz, M.; Sepúlveda, D.R.; González-Aguilar, G.; Olivas, G.I. Biochemistry of Apple Aroma: A Review. *Food Technol. Biotechnol.* **2016**, *54*, 375–397.
109. Calamai, L.; Villanelli, F.; Bartolucci, G.; Pieraccini, G.; Moneti, G. Sample Preparation for Direct MS Analysis of Food. In *Comprehensive Sampling and Sample Preparation*; Pawliszyn, J., Ed.; Academic Press: Amsterdam, The Netherlands, 2012; pp. 535–557.
110. Facundo, H.V.V.; Garruti, D.S.; Cordenunsi, B.R.; Lajolo, F.M. Isolation of volatiles compounds in banana by HS-SPME: Optimization for the whole fruit and pulp. *Int. J. Biosci. Biochem. Bioinform* **2013**, *3*, 110–115.
111. Pino, J.A.; Febles, Y. Odour-active compounds in banana fruit cv. Giant Cavendish. *Food Chem.* **2013**, *141*, 795–801.
112. Boonsupa, W.; Chumchuere, S.; Chaovaratt, M. Evolution of Volatile Compounds Generated During One-Stage and Two-Stage Fermentation and Aging Processes of Banana Vinegars Using HS-SPME-GC-MS. *Indian J. Biotechnol.* **2017**, *13*, 147.
113. Tian, J.; Yu, J.; Chen, X.; Zhang, W. Determination and quantitative analysis of acetoin in beer with headspace sampling-gas chromatography. *Food Chem.* **2009**, *112*, 1079–1083.
114. Liang, S.; Wan, C. Carboxylic acid production from brewer's spent grain via mixed culture fermentation. *Bioresour. Technol.* **2015**, *182*, 179–183.
115. Macku, C.; Jennings, G. Production of volatiles by ripening bananas. *J. Agric. Food Chem.* **1987**, *35*, 845–848.
116. Harb, J.; Streif, J.; Bangerth, K.F. Aroma volatiles of apples as influenced by ripening and storage procedures. *Acta Hort.* **2008**, *796*, 93–103.
117. Dong, L.; Hou, Y.; Li, F.; Piao, Y.; Zhang, X.; Zhang, X.; Li, C.; Zhao, C. Characterization of volatile aroma compounds in different brewing barley cultivars. *J. Sci. Food Agric.* **2015**, *95*, 915–921.
118. Overton, S.F.; Manura, J.J. Note 17- Identification of Volatile Organics in Wines Over Time. Available online: <https://www.sisweb.com/referenc/applnote/app-17.htm> (accessed in February 20, 2017).
119. Krzymien, M.; Day, M.; Shaw, K.; Zaremba, L. An Investigation of Odors and Volatile Organic Compounds Released during Composting. *J. Air Waste Manag.* **1999**, *49*, 804–813.
120. Verstrepen, K.J.; Derdelinckx, G.; Dufour, J.P.; Winderickx, J.; Thevelein, J.M.; Pretorius, I.S.; Delvaux, F.R. Flavor-active esters: Adding fruitiness to beer. *J. Biosci. Bioeng.* **2003**, *96*, 110–118.
121. Kopsahelis, N.; Kanellaki, M.; Bekatorou, A. Low temperature brewing using cells immobilized on Brewer's spent grains. *Food Chem.* **2007**, *104*, 480–488.
122. Wang, J.; Chen, Q.; Hu, K.; Zeng, L.; Pan, Y.; Huang, H. Change in aromatic components of banana during the preparation process of juice and microcapsule powder. *J. Food Sci. Technol.* **2011**, *46*, 1398–1405.
123. FooDB. Available online: <https://foodb.ca/compounds/FDB008079> (accessed in February 20, 2017).
124. Madrera, R.R.; Valles, B.S. Determination of Volatile Compounds in Apple Pomace by Stir Bar Sorptive Extraction and Gas Chromatography-Mass Spectrometry (SBSE-GC-MS). *J. Food Sci.* **2011**, *76*, C1326–C1334.
125. Cellini, A.; Biondi, E.; Blasioli, S.; Rocchi, L.; Farneti, B.; Braschi, I.; Savioli, S.; Rodriguez-Estrada, M.; Biasioli, F.; Spinelli, F. Early detection of bacterial diseases in apple plants by analysis of volatile organic compounds profiles and use of electronic nose. *Ann. Appl. Biol.* **2016**, *168*, 409–420.
126. Toledo, J.; Malo, E.A.; Cruz-López, L.; Rojas, J.C. Field evaluation of potential fruit-derived lures for *Anastrepha obliqua* (Diptera: Tephritidae). *J. Econ. Entomol.* **2009**, *102*, 2072–2077.
127. Beaulieu, J.C.; Grimm, C.C. Identification of Volatile Compounds in Cantaloupe at Various Developmental Stages Using Solid Phase Microextraction. *J. Agric. Food Chem.* **2001**, *49*, 1345–1352.

128. Jordán, M.J.; Tandon, K.; Shaw, P.E.; Goodner, K.L. Aromatic profile of aqueous banana essence and banana fruit by gas chromatography-mass spectrometry (GC-MS) and gas chromatography-olfactometry (GC-O). *J. Agric. Food Chem.* **2001**, *49*, 4813–4817.
129. Api, A.M.; Belsito, D.; Botelho, D.; Bruze, M.; Burton, G.A.; Buschmann, J.; Dagli, M.L.; Date, M.; Dekant, W.; Deodhar, C.; *et al.* RIFM fragrance ingredient safety assessment, ethyl 2-methylbutyrate, CAS Registry Number 7452-79-1. *Food Chem. Toxicol.* **2018**, *122*, 738–S746.
130. Ferreira, L.; Perestrelo, R.; Caldeira, M.; Câmara, J.S. Characterization of volatile substances in apples from Rosaceae family by headspace solid-phase microextraction followed by GC-qMS. *J. Sep. Sci.* **2009**, *32*, 1875–1888.
131. Kim, E.; Chang, Y.H.; Ko, J.Y.; Jeong, Y. Physicochemical and Microbial Properties of the Korean Traditional Rice Wine, Makgeolli, Supplemented with Banana during Fermentation. *Prev. Nutr. Food Sci.* **2013**, *18*, 203–209.
132. Palade, L.M.; Duta, D.; Popescu, C.; Croitoru, C.; Popa, M.E. Differentiation of three grape varieties by means of sensory analysis and characterization of the volatile compounds profile of their musts. *Rom. Biotechnol. Lett.* **2016**, *22*, 12005.
133. Capobianco, M.; Mastello, R.B.; Chin, S.-T.; Oliveira, E.d.S.; de Lourdes Cardeal, L.; Marriott, P.J. Identification of aroma-active volatiles in banana Terra spirit using multidimensional gas chromatography with simultaneous mass spectrometry and olfactometry detection. *J. Chromatogr. A* **2015**, *3*, 1388, 227–235.
134. Kleinova, J.; Klejdus, B. Determination of Volatiles in Beer using Solid-Phase Microextraction in Combination with Gas Chromatography/Mass Spectrometry. *Czech J. Food Sci.* **2014**, *32*, 241–248.
135. Zhu, X.; Li, Q.; Li, J.; Luo, J.; Chen, W.; Li, X. Comparative Study of Volatile Compounds in the Fruit of Two Banana Cultivars at Different Ripening Stages. *Molecules* **2018**, *23*, 2456.
136. Fuhrmann, E.; Grosch, W. Character impact odorants of the apple cultivars Elstar and Cox Orange. *Nahrung* **2002**, *46*, 187–193.
137. Yauk, Y.-K.; Souleyre, E.J.F.; Matich, A.J.; Chen, X.; Wang, M.Y.; Plunkett, B.; Dare, A.P.; Espley, R.V.; Tomes, S.; Chagné, D.; *et al.* Alcohol acyl transferase 1 links two distinct volatile pathways that produce esters and phenylpropenes in apple fruit. *Plant J.* **2017**, *91*, 2292–2305.
138. Selvaraj, G.; Ramanathan, T.; Kaliamurthi, S. Characterization of Volatile Compounds from Bitter Apple (*Citrullus colocynthis*) Using GC-MS. *Int. J. Anal. Chem.* **2011**, *2*, 108–110.
139. Miranda, E.J.F.; Nogueira, R.I.; Pontes, S.M.; Rezende, C.M. Odour-active compounds of banana passa identified by aroma extract dilution analysis. *Flavour Frag. J.* **2001**, *16*, 281–285.
140. Chen, Y.; Zhou, Z.; Xu, K.; Zhang, H.; Thornton, M.; Sun, L.; Wang, Z.; Xu, X.; Dong, L. Comprehensive evaluation of malt volatile compounds contaminated by *Fusarium graminearum* during malting. *J. Inst. Brew.* **2017**, *123*, 480–487.
141. Steele, D.H.; Midwest, R.I.; Thornburg, M.J.; Stanley, J.S.; Miller, R.R.; Brooke, R.; Cushman, J.R.; Cruzan, G. Determination of styrene in selected foods. *J. Agric. Food Chem.* **1994**, *42*, 8, 1661–1665.
142. Langos, D.; Gastl, M.; Granvogl, M. Reduction of toxicologically relevant styrene in wheat beer using specially produced wheat and barley malts. *Eur. Food Res. Technol.* **2017**, *243*, 1711–1718.
143. Gou, W.; Zhang, L.; Chen, F.; Cui, Z.; Zhao, Y.; Zheng, P.; Tian, L.; Zhang, L. Foliar application of amino acids modulates aroma components of ‘fuji’ apple (*Malus Domestica* L.) *Pak. J. Bot.* **2015**, *47*, 6, 2257–2262.
144. FooDB. Available online: <https://foodb.ca/compounds/FDB001358> (accessed in February 20, 2017).
145. López, M.; Lavilla, M.; Riba, M.; Vendrell, M. Comparison of Volatile Compounds in Two Seasons in Apples: Golden Delicious and Granny Smith. *J. Food Qual.* **1998**, *21*, 155–166.
146. Kaminski, E.; Stawicki, S.; Wasowicz, E. Volatile Flavor Compounds Produced by Molds of *Aspergillus*, *Penicillium*, and *Fungi imperfecti*. *Appl. Microbiol.* **1974**, *27*, 1001–1004.
147. Mehinagic, E.; Royer, G.; Symoneaux, R.; Jourjon, F.; Prost, C. Characterization of odor-active volatiles in apples: Influence of cultivars and maturity stage. *J. Agric. Food Chem.* **2006**, *54*, 2678–2687.

148. Wang, J.; Li, Y.; Chen, R.; Bao, J.; Yang, G. Comparison of volatiles of banana powder dehydrated by vacuum belt drying, freeze-drying and air-drying. *Food Chem.* **2007**, *104*, 1516–1521.
149. Fărcaș, A.; Socaci, S.; Francisc, D.; Tofana, M.; Mudura, E.; Diaconeasa, Z. Volatile profile, fatty acids composition and total phenolics content of brewers' spent grain by-product with potential use in the development of new functional foods. *J. Cereal Sci.* **2015**, *64*, 34–42.
150. Wongs-Aree, C.; Noichinda, S. Sugar apple (*Annona squamosa* L.) and atemoya (*A. cherimola* Mill. × *A. squamosa* L.). In *Postharvest Biology and Technology of Tropical and Subtropical Fruits: Mangosteen to White Sapote*; Yahia, E.M., Ed.; Woodhead Publishing Limited: Sawston, UK, 2011, pp. 399–426.
151. Truta, D.; Tofana, M.; Socaci, S. The Evolution of The Volatile Compounds by Aging, In Apple Vinegar Flavored with *Rosmarinus Officinalis* L., Using A GC-MS Technique. *J. Agroaliment. Process. Technol.* **2010**, *16*, 155.
152. Pino, J.A.; Marbot, R.; Rosado, A.; Vázquez, C. Volatile constituents of Malay rose apple [*Syzygium malaccense* (L.) Merr. and Perry]. *Flavour Frag. J.* **2004**, *19*, 32–35.
153. Shiota, H. New esteric components in the volatiles of banana fruit (*Musa sapientum* L.). *J. Agric. Food Chem.* **1993**, *41*, 2056–2062.
154. Fărcaș, A.C.; Socaci, S.A.; Tofană, M.; Mureșan, C.; Mudura, E.; Salanță, L.; Scrob, S. Nutritional properties and volatile profile of brewer's spent grain supplemented bread. *Rom. Biotechnol. Lett.* **2014**, *19*, 9075–9714.
155. López, M.L.; Villatoro, C.; Fuentes, T.; Graell, J.; Lara, I.; Echeverría, G. Volatile compounds, quality parameters and consumer acceptance of 'Pink Lady®' apples stored in different conditions. *Postharvest Biol. Technol.* **2007**, *43*, 55–66.
156. Wei, A.; Mura, K.; Shibamoto, T. Antioxidative Activity of Volatile Chemicals Extracted from Beer. *J. Agric. Food Chem.* **2001**, *9*, 4097–4101.
157. Lara, I.; Graell, J.; López, M.L.; Echeverría, G. Multivariate analysis of modifications in biosynthesis of volatile compounds after CA storage of 'Fuji' apples, *Postharvest Biol. Technol.* **2006**, *39*, 19–28.
158. Rowan, D.D.; Hunt, M.B.; Dimouro, A.; Alspach, P.A.; Weskett, R.; Volz, R.K.; Gardiner, S.E.; Chagné, D. Profiling fruit volatiles in the progeny of a 'Royal Gala' × 'Granny Smith' pple (*Malus x domestica*) cross. *J. Agric. Food Chem.* **2009**, *57*, 7953–7961.
159. Fleming-Jones, M.; Smith, R. Volatile Organic Compounds in Foods: A Five Year Study. *J. Agric. Food Chem.* **2004**, *51*, 8120–8127.
160. Chen, L.Y.; Wu, C.C.; Chou, T.I.; Chiu, S.W.; Tang, K.T. Development of a Dual MOS Electronic Nose/Camera System for Improving Fruit Ripeness Classification. *Sensors* **2018**, *18*, 3256.
161. Sun, J. D-Limonene: Safety and clinical applications. *Sci. Rev. Altern. Med.* **2007**, *12*, 259–264.
162. Fein, B.L.; Reissig, W.H.; Roelofs, W.L. Identification of apple volatiles attractive to the apple maggot, *Rhagoletis pomonella*. *J. Chem. Ecol.* **1982**, *8*, 1473–1487.
163. Lasekan, O.; Khatib, A.; Juhari, H.; Patiram, P.; Lasekan, S. Headspace solid-phase microextraction gas chromatography-mass spectrometry determination of volatile compounds in different varieties of African star apple fruit (*Chrysophyllum albidum*). *Food Chem.* **2013**, *141*, 2089–2097.
164. Api, A.M.; Belsito, D.; Botelho, D.; Bruze, M.; Burton, G.A.; Buschmann, J.; Dagli, M.L.; Date, M.; Dekant, W.; Deodhar, C.; et al. RIFM fragrance ingredient safety assessment, acetophenone, CAS Registry Number 98-86-2. *Food Chem. Toxicol.* **2018**, *118*, 162–169.
165. Hern, A.; Dorn, S. A female-specific attractant for the codling moth, *Cydia pomonella*, from apple fruit volatiles. *Naturwissenschaften* **2004**, *91*, 77–80.
166. Balázs, A.; Tóth, M.; Blazics, B.; Héthelyi, É.; Szarka, S.; Ficsor, E.; Ficsek, G.; Lemberkovics, É.; Blázovics, A. Investigation of dietary important components in selected red fleshed apples by GC-MS and LC-MS. *Fitoterapia* **2012**, *83*, 1356–1363.
167. Mir, N.A.; Beaudry, R. Effect of superficial scald suppression by diphenylamine application on volatile evolution by stored Cortland apple fruit. *J. Agric. Food Chem.* **1999**, *47*, 7–11.
168. Matich, A.; Rowan, D. Pathway analysis of branched-chain ester biosynthesis in apple using deuterium labeling and enantioselective gas chromatography-mass spectrometry. *J. Agric. Food Chem.* **2007**, *55*, 2727–2735.

169. Qin, L.; Wei, Q.-P.; Kang, W.-H.; Zhang, Q.; Sun, J.; Liu, S.-Z. Comparison of Volatile Compounds in 'Fuji' Apples in the Different Regions in China. *Food Sci. Technol.* **2017**, *23*, 79–89.
170. Zhang, C.; Chen, X.; Song, H.; Liang, Y.; Zhao, C.; Li, H. Volatile Compound Profiles of *Malus baccata* and *Malus prunifolia* Wild Apple Fruit. *J. Am. Soc. Hortic. Sci.* **2017**, *142*, 126–134.
171. Maga, J.A.; Katz, I. Simple phenol and phenolic compounds in food flavour *Crit. Rev. Food Sci. Nutr.* **1978**, *10*, 323–372.
172. Chan, S.T.; Yao, M.W.Y.; Wong, Y.C.; Wong, T.; Mok, C.S.; Sin, D.W.M. Evaluation of chemical indicators for monitoring freshness of food and determination of volatile amines in fish by headspace solid-phase microextraction and gas chromatography-mass spectrometry. *Eur. Food Res. Technol.* **2006**, *224*, 67–74.
173. Caldeira, M.; Rodrigues, F.; Perestrelo, R.; Marques, J.C.; Câmara, J.S. Comparison of two extraction methods for evaluation of volatile constituents patterns in commercial whiskeys. Elucidation of the main odour-active compounds. *Talanta* **2007**, *74*, 78–90.
174. Polychroniadou, E.; Kanellaki, M.; Iconomopoulou, M.; Koutinas, A.A.; Marchant, R.; Banat, I.M. Grape and apple wines volatile fermentation products and possible relation to spoilage. *Bioresour. Technol.* **2003**, *87*, 337–339.
175. Cheng, H. Volatile flavor compounds in yogurt: A review. *Crit. Rev. Food Sci. Nutr.* **2010**, *50*, 938–950.
176. Aprea, E.; Biasioli, F.; Gasperi, F. Volatile compounds of raspberry fruit: From analytical methods to biological role and sensory impact. *Molecules* **2015**, *20*, 2445–2474.
177. Fukami, K.; Ishiyama, S.; Yaguramaki, H.; Masuzawa, T.; Nabeta, Y.; Endo, K.; Shimoda, M. Identification of distinctive volatile compounds in fish sauce. *J. Agric. Food Chem.* **2002**, *50*, 5412–5416.
178. Steingass, C.B.; Dell, C.; Lieb, V.; Mayer-Ullmann, B.; Czerny, M.; Carle, R. Assignment of distinctive volatiles, descriptive sensory analysis and consumer preference of differently ripened and post-harvest handled pineapple (*Ananas comosus* [L.] Merr.) fruits. *Eur. Food Res. Technol.* **2016**, *242*, 33–43.
179. Dudley, R. Ethanol, Fruit Ripening, and the Historical Origins of Human Alcoholism in Primate Frugivory. *Integr. Comp. Biol.* **2004**, *44*, 315–323.
180. Yan, J.W.; Ban, Z.J.; Lu, H.Y.; Li, D.; Poverenov, E.; Luo, Z.S.; Li, L. The aroma volatile repertoire in strawberry fruit: A review. *J. Sci. Food Agric.* **2018**, *98*, 4395–4402.
181. El Had, M.A.; Zhang, F.J.; Wu, F.F.; Zhou, C.H.; Tao, J. Advances in fruit aroma volatile research. *Molecules* **2013**, *18*, 8200–8229.
182. Bruna, J.M.; Hierro, E.M.; de la Hoz, L.; Mottram, D.S.; Fernández, M.; Ordóñez, J.A. The contribution of *Penicillium aurantiogriseum* to the volatile composition and sensory quality of dry fermented sausages. *Meat Sci.* **2001**, *59*, 97–107.
183. Shahidi, F.; Pegg, R.B. Hexanal as An Indicator of Meat Flavor Deterioration. *J. Food Lipids* **1994**, *1*, 177–186.
184. Petersen, M.A.; Poll, L.; Larsen, L.M. Changes in flavor-affecting aroma compounds during potato storage are not associated with lipoxygenase activity. *Am. Potato J.* **2003**, *80*, 397–402.
185. Jetti, R.R.; Yang, E.; Kurnianta, A.; Finn, C.; Qian, M.C. Quantification of selected aroma-active compounds in strawberries by headspace solid-phase microextraction gas chromatography and correlation with sensory descriptive analysis. *J. Food Sci.* **2007**, *72*, 487–496.
186. Serradilla, M.; Joaquín, M.; Hernández, A.; López Corrales, M.; Ruiz-Moyano Seco de Herrera, S.; de Guía Córdoba, M.; Martín, A. Composition of the Cherry (*Prunus avium* L. and *Prunus cerasus* L.; Rosaceae). In *Nutritional Composition of Fruit Cultivars*; Simmonds, M.S.J., Preedy, V.R., Eds.; Academic Press: Amsterdam, The Netherlands, 2016, pp. 127–147.
187. Parlapani, F.F.; Mallouchos, A.; Serkos, A.; Ioannis, H.; Boziaris, S. Volatile organic compounds of microbial and non-microbial origin produced on model fish substrate uninoculated and inoculated with gilt-head sea bream spoilage bacteria. *LWT* **2017**, *78*, 54–62.
188. Phan, N.-T.; Kim, K.-H.; Jeon, E.-C.; Kim, U.-H.; Sohn, J.R.; Pandey, S.K. Analysis of volatile organic compounds released during food decaying processes. *Environ. Monit. Assess.* **2012**, *184*, 1683–1692.
189. Wang, Y.; Yang, C.; Li, S.; Yang, L.; Wang, Y.; Zhao, J.; Jiang, Q. Volatile characteristics of 50 peaches and nectarines evaluated by HP-SPME with GC-MS. *Food Chem.* **2009**, *116*, 356–364.

190. Frank, D.C.; Owen, C.M.; Patterson, J. Solid phase microextraction (SPME) combined with gas-chromatography and olfactometry-mass spectrometry for characterization of cheese aroma compounds LWT. *J. Food Sci. Tec.* **2004**, *37*, 139–154.
191. Nogueira, M.C.L.; Lubachevsky, G.; Rankin, S.A. A study of the volatile composition of Minas cheese. *LWT* **2005**, *38*, 555–563.
192. Cho, S.J.; Kim, A.K.; Kwak, J.E.; Kim, J.Y.; Kim, S.J.; Kum, J.Y.; Kim, I.Y.; Kim, J.H.; Chae, Y.Z. Monitoring of 1-hexene and 1-octene in Hygienic Polyethylene-based Packaging. *J. Food Hyg. Saf.* **2011**, *26*, 383–387.
193. Buffo, R.; Cardelli-Freire, C. Coffee flavour: An overview. *Flavour Frag. J.* **2004**, *19*, 99–104.
194. Park, E.R.; Lee, H.J.; Kim, K. Volatile Flavor Components in *Bogyojosaeng* and *Suhong* Cultivars of Strawberry (*Fragaria ananassa* Duch.) *J. Food Sci. Nut.* **2000**, *5*, 119–125.
195. Zhou, A.; McFeeters, R.F. Volatile Compounds in Cucumbers Fermented in Low-Salt Conditions. *J. Agric. Food Chem.* **1998**, *46*, 2117–2122.
196. Lasekan, O.; Azeez, S. Chemo-preventive Activities of Common Vegetables' Volatile Organic Compounds (VOCs). *Pharm. Anal. Acta* **2014**, *2*, 7.
197. Engel, E.; Baty, C.; le Corre, D.; Souchon, I.; Martin, N. Flavor-Active Compounds Potentially Implicated in Cooked Cauliflower Acceptance. *J. Agric. Food Chem.* **2002**, *50*, 6459–6467.
198. Goulet, C.; Mageroy, M.H.; Lam, N.B.; Floystad, A.; Tieman, D.M.; Klee, H.J. Role of an esterase in flavor volatile variation within the tomato clade. *Proc. Natl. Acad. Sci. USA* **2012**, *109*, 19009–19014.
199. Kiritsakis, A.K. Flavor Components of Olive Oil—A Review. *J. Am. Oil Chem. Soc.* **1998**, *75*, 673–681.
200. Ulrich, D.; Hoberg, E.; Rapp, A.; Kecke, S. Analysis of strawberry flavour: Discrimination of aroma types by quantification of volatile compounds. *Zeitschrift für Lebensmitteluntersuchung und-Forschung A* **1997**, *205*, 218–223.
201. Rosillo, L.; Salinas, M.R.; Garijo, J.; Alonso, G.L. Short communication Study of volatiles in grapes by dynamic headspace analysis Application to the differentiation of some *Vitis vinifera* varieties. *J. Chromatogr. A* **1999**, *847*, 155–159.
202. Pino, J.A. Odour-active compounds in pineapple (*Ananas comosus* [L.] Merrill cv. Red Spanish). *Int. J. Food Sci.* **2013**, *48*, 564–570.
203. Akbar Ali, M.; Violi, A. Reaction pathways for the thermal decomposition of methyl butanoate. *J. Org. Chem.* **2013**, *78*, 5898–5908.
204. Cheng, Y.; Xu, Q.; Liu, J.; Zhao, C.; Xue, F.; Zhao, Y. Decomposition of five phenolic compounds in high temperature water. *J. Brazil Chem. Soc.* **2014**, *25*, 2102–2107.
205. Papuc, C.; Goran, G.V.; Predescu, C.N.; Nicorescu, V. Mechanisms of oxidative processes in meat and toxicity induced by postprandial degradation products: A review. *Compr. Rev. Food Sci. Food Saf.* **2017**, *16*, 96–123.
206. Decimo, M.; Cabeza, M.C.; Ordóñez, J.A.; De Noni, I.; Brasca, M. Volatile organic compounds associated with milk spoilage by psychrotrophic bacteria. *Int. J. Dairy Technol.* **2018**, *71*, 593–600.
207. Zareian, M.; Böhner, N.; Loos, H.M.; Silcock, P.; Bremer, P.; Beauchamp, J. Evaluation of volatile organic compound release in modified atmosphere-packaged minced raw pork in relation to shelf-life. *Food Packag. Shelf Life* **2018**, *18*, 51–61.
208. Illikoud, N.; Rossero, A.; Chauvet, R.; Courcoux, P.; Pilet, M.-F.; Charrier, T.; Jaffrès, E.; Zagorec, M. Genotypic and phenotypic characterization of the food spoilage bacterium *Brochothrix thermosphacta*. *Food Microb.* **2019**, *81*, 22–31.
209. Ziyaina, M.; Rasco, B.; Coffey, T.; Ünlü, G.; Sablani, S.S. Colorimetric detection of volatile organic compounds for shelf-life monitoring of milk. *Food Control.* **2019**, *100*, 220–226.
210. Bennett, J.W.; Inamdar, A.A. Are some fungal volatile organic compounds (VOCs) mycotoxins? *Toxins* **2015**, *7*, 3785–3804.
211. Comi, G. Spoilage of Meat and Fish. In *The Microbiological Quality of Food: Foodborne Spoilers*; Bevilacqua, A., Corbo, M.R., Sinigaglia, M., Eds.; Woodhead Publishing: Sawston, UK, 2016; pp. 179–210.
212. Pennerman, K.K.; Al-Maliki, H.S.; Lee, S.; Bennett, J.W. Fungal volatile organic compounds (VOCs) and the genus *Aspergillus*. In *New and Future Developments in Microbial Biotechnology and Bioengineering*; Gupta, V.K., Ed.; Elsevier: Amsterdam, The Netherlands, 2016; pp. 95–115.

213. Krings, U.; Hardebusch, B.; Albert, D.; Berger, R.G.; Maróstica, M.; Pastore, G.M. Odor-active alcohols from the fungal transformation of  $\alpha$ -farnesene. *J. Agric. Food Chem* **2006**, *54*, 9079–9084.
214. Pinches, S.E.; Apps, P. Production in food of 1, 3-pentadiene and styrene by *Trichoderma* species. *Int. J. Food Microbiol.* **2007**, *116*, 182–185.
215. Karlshøj, K.; Nielsen, P.V.; Larsen, T.O. Fungal Volatiles: Biomarkers of Good and Bad Food Quality. In *Food Mycology: A Multifaceted Approach to Fungi and Food*; Dijksterhuis, J., Samson, R.A., Eds.; CRC Press: Boca Raton, FL, USA, 2007; pp. 279–302.
216. Wang, Y.; Li, Y.; Yang, J.; Ruan, J.; Sun, C. Microbial volatile organic compounds and their application in microorganism identification in foodstuff. *TrAC Trends Analyt. Chem.* **2016**, *8*, 1–16.
217. da Silva, N.C.; Nascimento, C.F.; Nascimento, F.A.; de Resende, F.D.; Daniel, J.L.P.; Siqueira, G.R. Fermentation and aerobic stability of rehydrated corn grain silage treated with different doses of *Lactobacillus buchneri* or a combination of *Lactobacillus plantarum* and *Pediococcus acidilactici*. *Int. J. Dairy Sci.* **2016**, *101*, 4158–4167.
218. Granado-Serrano, A.B.; Martín-Garí, M.; Sánchez, V.; Riart Solans, M.; Berdún, R.; Ludwig, I.A.; Rubió, L.; Vilaprinyó, E.; Portero-Otín, M.; Serrano, J.C.E. Faecal bacterial and short-chain fatty acids signature in hypercholesterolemia. *Sci. Rep.* **2019**, *9*, 1–13.
219. Spadafora, N.D.; Cammarisano, L.; Rogers, H.J.; Müller, C.T. Using volatile organic compounds to monitor shelf-life in rocket salad. *Acta Hort.* **2018**, *1194*, 1299–1306.
